# Supplementary material for: Retinal metabolic events in preconditioning light stress as revealed by wide-spectrum targeted metabolomics
Source: PubMed Central journal article supplement (PMC5486622; doi:10.1007/s11306-016-1156-9), 2017-01-20
Supplement: 11306_2016_1156_MOESM1_ESM.pdf [file 11306_2016_1156_MOESM1_ESM.pdf]

## Supplementary Material

- [Supplementary Text \(and references\)](#)

- [Supplementary Methods: S1](#)

- [Supplementary Tables: S2, S3, S4, S5, S6](#)

---

### **Supplementary Text - *Differences between male and female retinal metabolome***

While retinal neurons, as most other CNS structures, rely on glucose as the main source of ATP, some retinal cellular types such as retinal pigment epithelium (RPE) cells, involve FA oxidation (FAO) and thus carnitine metabolism (Adijanto et al. 2014; Tini 2002). Indeed, shortly after light onset, RPE cells phagocytose shed tips of photoreceptors leading to the formation of disk-enriched phagosomes. Phagosomes eventually become phagolysosomes after having fused with early and then late endosomes (Kevany and Palczewski 2010). Before entering the mitochondria for oxidation, free fatty acids (FFA) resulting from lipid digestion in phagolysosomes are rapidly combined to coenzyme A, thereby forming acyl-CoA. FFA transport into the mitochondrial matrix requires bonding to carnitine catalyzed by carnitine palmitoyl-transferase 1 (CPT-1; EC 2.3.1.21). Acyl-carnitine is then transported into the mitochondrial matrix by the mitochondrial inner membrane transporter carnitine acyl-carnitine translocase (CACT) (Schooneman et al. 2013). Because of its role in FFA catabolism, CPT-1 is believed to be a key enzyme regulating the rate of FA oxidation (McGarry and Brown 1997). Once in the mitochondrial matrix, CPT-2 (EC 2.3.1.21) cleaves acyl-carnitine into carnitine and acyl-CoA that can undergo FAO (Ramsay et al. 2001). Evidence has been provided for carnitine uptake and oxidation of FA released from phagocytized photoreceptors by RPE cells (Adijanto et al. 2014; Tini 2002). Our results suggest a relatively decreased fatty acid (FA) oxidation rate in male compared to female retinas. That is, FA released from phagocytized photoreceptors in RPE cells may have outpaced mitochondrial oxidative capacity, eventually leading to an increased acyl carnitine accumulation in male retinas. Nevertheless, the activity of CPT-1, as measured by the (C16+C18)-to-C0 ratio, was not significantly higher in female compared to male retinas. It is possible that other “post-CPT-1 events” such as an increased mitochondria number or overall

mitochondrial activity could have led to an increase FAO capacity in females, a pattern similar to that found in human skeletal muscle (Kim et al. 2000).

As a matter of fact, a likely cause of the sexual dimorphism in lipid metabolism is the increased estrogen-mediated mitochondrial biogenesis in female retinas. Estrogens increase mitochondrial biogenesis by upregulating nuclear and mitochondrial transcription factors like the Nuclear Respiratory Factor 1 and 2 (NRF 1 and NRF 2), the mitochondrial transcription factor (Tfam) and the three members of the PPAR $\gamma$  coactivator 1 (PGC-1) family, PGC-1 $\alpha$ , PGC-1 $\beta$  and PGC-1 related coactivator (PRC) (Klinge 2009; Mattingly et al. 2008; Tcherepanova et al. 2000). The interaction between PGC-1 $\alpha$  and members of the peroxisome proliferator-activated receptor (PPARs) family has been shown to increase not only mitochondria biogenesis but also FAO in muscle and liver (Finck and Kelly 2006). It has also been shown that PPAR $\gamma$  expression in RPE cells is selectively enhanced after photoreceptor phagocytosis (Ershov and Bazan 2000). In addition, the peak in PGC-1 $\alpha$  expression in mouse RPE cells has been found to coincide with maximal RPE phagocytosis activity (Stone et al. 2008). Recently, Iavovelli *et al.* have demonstrated that PGC-1 $\alpha$  overexpression lead to a potent induction of mitochondrial respiration and fatty-acid oxidation in RPE cells (Iacovelli et al. 2016).

The expression of both subtypes of estrogen receptors alpha and beta (ER  $\alpha$  and ER  $\beta$ ) and androgen receptor (AR) in rat and human retinas has been well documented (Kobayashi et al. 1998; Munaut et al. 2001; Ogueta et al. 1999; Rocha 2000; Wickham et al. 2000). Furthermore, the retina, as well as other structures of the central nervous system (CNS), is capable of steroidogenesis with synthesis of estradiol (E2) from cholesterol and from testosterone aromatization (reviewed in (Cascio et al. 2015)). Taken as a whole, the hypothesis of a stimulation of mitochondria biogenesis and FAO capacity by estrogens in females is likely. We nevertheless recognize that further research has to be conducted to examine the specific involvement of estrogens in facilitating lipid recycling after photoreceptor phagocytosis.

In addition to lipids, some nitrogen-containing compounds have been found to be sexually dimorphic. In fact, male retinas had a relatively increased concentration in acetyl-ornithine (Ac-Orn) and tyrosine (**Fig. 4**). Deacetylation of Ac-Orn by aminoacylase 1 (EC 3.5.1.14) is the sole reaction of Ac-Orn metabolism mentioned in rat metabolic pathway database (e.g., KEGG, <http://www.kegg.jp>). Unfortunately, literature data are lacking about normal concentration and possible functions of this metabolite in the retina. Considering its

connections to glutamate metabolism and the urea cycle, one may assume a role of Ac-Orn in retina signaling but this needs further investigation.

Retinal tyrosine concentrations have been shown to parallel tyrosine plasmatic concentration (Fernstrom and Fernstrom 2007) and plasmatic tyrosine concentration has been found to be significantly higher in male rats compared to females (Chance et al. 1995). Armstrong *et al.* also found significantly higher tyrosine concentration in men compared to women plasma (Armstrong and Stave 1973). Thus, the higher content in retinal tyrosine in males is simply due to the larger availability in plasmatic tyrosine. It should be noted that tyrosine can be converted to dopamine by tyrosine hydroxylase (EC 1.14.16.2) in retinal dopaminergic neurons, and this reaction is stimulated by light and follows a circadian rhythm (Iuvone et al. 1978). Here, rat culling was carried out in the dark and that could explain why, unlike tyrosine, dopamine was not amongst top metabolites increased in male retinas.

### References for Supplementary Text

- Adjianto, J., Du, J., Moffat, C., Seifert, E. L., Hurley, J. B., & Philp, N. J. (2014). The retinal pigment epithelium utilizes fatty acids for ketogenesis implications for metabolic coupling with the outer retina. *Journal of Biological Chemistry*, 289(30), 20570–20582. doi:10.1074/jbc.M114.565457
- Armstrong, M. D., & Stave, U. (1973). A study of plasma free amino acid levels. II. Normal values for children and adults. *Metabolism*, 22(4), 561–569. doi:10.1016/0026-0495(73)90069-3
- Cascio, C., Deidda, I., Russo, D., & Guarneri, P. (2015). The estrogenic retina: The potential contribution to healthy aging and age-related neurodegenerative diseases of the retina. *Steroids*, 103, 31–41. doi:10.1016/j.steroids.2015.08.002
- Chance, W. T., Grossman, C. J., Newrock, R., Bovin, G., Yerian, S., Schmitt, G., & Mendenhall, C. (1995). Effects of electromagnetic fields and gender on neurotransmitters and amino acids in rats. *Physiology and Behavior*, 58(4), 743–748. doi:10.1016/0031-9384(95)00090-6
- Ershov, A. V., & Bazan, N. G. (2000). Photoreceptor phagocytosis selectively activates PPAR  $\gamma$  expression in retinal pigment epithelial cells. *Journal of Neuroscience Research*, 60(3), 328–337. doi:10.1002/(SICI)1097-4547(20000501)60:3<328::AID-JNR7>3.0.CO;2-5
- Fernstrom, J. D., & Fernstrom, M. H. (2007). Tyrosine, phenylalanine, and catecholamine synthesis and function in the brain. *The Journal of nutrition*, 137(6 Suppl 1), 1539S–1548S. doi:137/6/1539S [pii]
- Finck, B. N., & Kelly, D. P. (2006). PGC-1 coactivators: Inducible regulators of energy metabolism in health and disease. *Journal of Clinical Investigation*, 116(3), 615–622. doi:10.1172/JCI27794
- Iacovelli, J., Rowe, G. C., Khadka, A., Diaz-Aguilar, D., Spencer, C., Arany, Z., & Saint-Geniez, M. (2016). PGC-1 $\alpha$  induces human RPE oxidative metabolism and antioxidant capacity. *Investigative Ophthalmology and Visual Science*, 57(3), 1038–1051. doi:10.1167/iovs.15-17758
- Iuvone, P. M., Galli, C. L., Garrison-Gund, C. K., & Neff, N. H. (1978). Light stimulates

- tyrosine hydroxylase activity and dopamine synthesis in retinal amacrine neurons. *Science*, 202(4370), 901–902. doi:10.1126/science.30997
- Kevany, B. M., & Palczewski, K. (2010). Phagocytosis of Retinal Rod and Cone Photoreceptors. *Physiology (Bethesda, Md.)*, 25(1), 8–15. doi:10.1152/physiol.00038.2009
- Kim, J. Y., Hickner, R. C., Cortright, R. L., Dohm, G. L., & Houmard, J. a. (2000). Lipid oxidation is reduced in obese human skeletal muscle. *American journal of physiology. Endocrinology and metabolism*, 279(5), E1039–E1044.
- Klinge, C. M. (2009). Estrogenic control of mitochondrial function and biogenesis. *J Cell Biochem*, 105(6), 1342–1351. doi:10.1002/jcb.21936
- Kobayashi, K., Kobayashi, H., Ueda, M., & Honda, Y. (1998). Estrogen Receptor Expression in Bovine and Rat Retinas, 39(11).
- Mattingly, K. A., Ivanova, M. M., Riggs, K. A., Wickramasinghe, N. S., Barch, M. J., & Klinge, C. M. (2008). Estradiol stimulates transcription of nuclear respiratory factor-1 and increases mitochondrial biogenesis. *Molecular endocrinology (Baltimore, Md.)*, 22(3), 609–22. doi:10.1210/me.2007-0029
- McGarry, J. D., & Brown, N. F. (1997). The Mitochondrial Carnitine Palmitoyltransferase System - From Concept to Molecular Analysis. *European Journal of Biochemistry*, 244(1), 1–14. doi:10.1111/j.1432-1033.1997.00001.x
- Munaut, C., Lambert, V., Noël, A., Frankenne, F., Deprez, M., Foidart, J. M., & Rakic, J. M. (2001). Presence of oestrogen receptor type beta in human retina. *The British journal of ophthalmology*, 85(7), 877–82. doi:10.1136/bjo.85.7.877
- Ogueta, S. B., Schwartz, S. D., Yamashita, C. K., & Farber, D. B. (1999). Estrogen receptor in the human eye: in uence of gender and age on gene expression. *Invest. Ophthalmol. Vis. Sci.*, 40(9), 1906–1911.
- Ramsay, R. R., Gandour, R. D., & van der Leij, F. R. (2001). Molecular enzymology of carnitine transfer and transport. *Biochimica et Biophysica Acta (BBA) - Protein Structure and Molecular Enzymology*, 1546(1), 21–43. doi:10.1016/S0167-4838(01)00147-9
- Rocha, E. M. (2000). Identification of androgen receptor protein and 5alpha -reductase mRNA in human ocular tissues. *British Journal of Ophthalmology*, 84(1), 76–84. doi:10.1136/bjo.84.1.76
- Schooneman, M. G., Vaz, F. M., Houten, S. M., & Soeters, M. R. (2013). Acylcarnitines: Reflecting or inflicting insulin resistance? *Diabetes*, 62(1), 1–8. doi:10.2337/db12-0466
- Stone, J., van Driel, D., Valter, K., Rees, S., & Provis, J. (2008). The locations of mitochondria in mammalian photoreceptors: Relation to retinal vasculature. *Brain Research*, 1189, 58–69. doi:10.1016/j.brainres.2007.10.083
- Tcherepanova, I., Puigserver, P., Norris, J. D., Spiegelman, B. M., & McDonnell, D. P. (2000). Modulation of estrogen receptor-?? transcriptional activity by the coactivator PGC-1. *Journal of Biological Chemistry*, 275(21), 16302–16308. doi:10.1074/jbc.M001364200
- Tini, T. (2002). Mitochondrial Fatty Acid beta-Oxidation in the Retinal Pigment Epithelium. *Pediatric Research*, 52(4), 595–600. doi:10.1203/01.PDR.0000030874.20888.2D
- Wickham, L. A., Gao, J., Toda, I., Rocha, E. M., Ono, M., & Sullivan, D. A. (2000). Identification of androgen, estrogen and progesterone receptor mRNAs in the eye. *Acta ophthalmologica Scandinavica*, 78(2), 146–153.

## Supplementary Method S1. Tissue collection, histological and immunohistochemistry (IHC) analysis and terminal deoxynucleotidyl transferase dUTP nick end labelling (TUNEL) analysis.

### Tissue collection

The superior aspect of each eye was marked for orientation. Each eye was enucleated with curved forceps and fixed in 4% paraformaldehyde. Fixed eyes were washed with 1M PBS and cryoprotected in 15% sucrose overnight at 4°C. All eyes were embedded in OCT medium (Leica Biosystems, Australia) prior to being frozen in acetone and dry ice. Cryosections were 12µm thick, cut in the parasagittal plane (superior-inferior) (CM1850; Leica); with the same orientation on Superfrost UltraPlus glass slides (ThermoScientific, Australia). Sections were then dried overnight at 37°C and stored at -20°C. Only sections containing the optic nerve head were used for analysis.

Retinas were visualized with the A1 Nikon confocal microscope and images were taken using NIS-Elements Advanced Research software (Nikon) at 10x magnification. Areas of interest were marked using ImageJ software (Rasband, W.S., ImageJ, U. S. National Institutes of Health, Bethesda, Maryland, USA) and their corrected total cell fluorescence (CTCF) was calculated as follows:

$$\text{CTCF} = \text{Integrated density} - (\text{Area of interest} \times \text{Mean fluorescence})$$

### Histology

Cryosections were fixed with 10% neutral buffered formalin (Sigma-Aldrich, Cat# HT501128-4L) then hydrated sequentially through decreasing concentrations of ethanol and Milli-Q water (Millipore, USA). Sections were then stained with Harris' Haematoxylin for 10 minutes then

washed with tap water. After a brief rinse with Milli-Q water, the sections were counter-stained with Eosin-Y solution (Sigma-Aldrich, Cat# HT110216-500ML) for 1 minute. The sections were dehydrated through increasing concentrations of ethanol (70%, 90% and 100% ethanol). They were then cleared in xylene for 5 minutes and coverslipped with Micromount (Leica Biosystems, Australia) and clear nail varnish. Staining was visualised using the brightfield function of the A1 Nikon confocal microscope and images were taken using NIS-Elements Advanced Research software (Nikon) at 10x magnification.

## Immunohistochemistry (IHC)

Cryosections were pre-treated with RevealIt for 3 hours at 37°C (ImmunoSolution, QLD, Australia). A hydrophobic barrier was marked using a PAP pen (Daido Sangyo, Tokyo, Japan) before incubation in 10% normal goat serum (NGS) (Sigma-Aldrich, Australia) for 1 hour at RT. Sections were then incubated in primary antibodies overnight at 4°C. To control for nonspecific binding by secondary antibodies, primary antibodies were omitted in designated negative control slides. All primary antibodies were diluted in 1% NGS. After the sections were washed in 0.1M PBS, there were incubated with secondary antibodies. Sections stained for COX5a were incubated with their secondary antibody, Mouse IgG-AlexFluor 594 conjugate (1:500; Life Technologies, Australia, Cat# A31623) for 2 hours at RT, while sections stained for IBA-1 were incubated with secondary antibody, Rabbit IgG-AlexFluor 488 conjugate (1:500; Life Technologies, Cat# A31627) for 4 hours at RT. All secondary antibodies were diluted with 0.1M PBS and the addition of all antibodies to slides were done in the dark. Sections were washed in 0.1M PBS before they were incubated in 0.05% Sudan Black B for 10 minutes to prevent auto-fluorescence. After another wash in 0.1M PBS, the blue fluorescent dye, bisbenzimidazole (BBZ)

(1:1000; Calbiochem, La Jolla, CA), was used to visualise cellular layers as it stains A-T rich regions. After a final wash in 0.1M PBS, sections were coverslipped with Aquamount (Polysciences, Warrington, PA, Cat# 18606) and clear nail varnish. Immunofluorescence was visualised with the A1 Nikon confocal microscope and images were taken using NIS-Elements Advanced Research software (Nikon) at 10x magnification.

## Terminal deoxynucleotidyl transferase dUTP nick end labelling (TUNEL)

Cryosections used for the TUNEL assay were permeabilised using Triton (0.1% w/ PBS) for 2 minutes at RT. Following a wash in 0.1M PBS, the sections were placed in 1M TdT buffer for 10 minutes at RT. TUNEL reaction mixture was made up according to the manufacturer's instructions (contained fresh and contained 89.11% Milli-Q water (Millipore), 10.51% 10M TdT buffer, 0.25% biotin-dUTP and 0.13% terminal transferase). Sections were marked with a PAP pen before incubation with TUNEL reaction mixture for 1 hour at 37°C with humidity. The reaction was stopped using 2M saline sodium citrate buffer (SSC) for 15 minutes before incubation in 10% normal goat serum for 10 minutes at RT. Streptavidin-AlexFluor 594 conjugate (1:500; Life Technologies, Australia, Cat# S32356) was applied to sections under dim conditions and then incubated for 1 hour at 37°C with humidity. Sections were washed in 0.1M PBS before being stained with BBZ for 2 minutes to visualise cellular layers. After a final wash in 0.1M PBS, sections were coverslipped with Aquamount and clear nail varnish. In TUNEL and ONL thickness analyses,  $n = 6$  animals were used per condition and at least 4 samples taken from each of the superior and inferior retina. Measurements were averaged for each of the superior and inferior retina for all samples and animals in the same experimental group.





**Table S3: Metabolite concentrations ( $\mu\text{mol/L}$  of extract) in rat retina.**

| Sample ID        | Protein (g/L) | CO      | C12   | C12:1 | C14   | C14:1 | C14:2 | C14:2-OH | C16   |
|------------------|---------------|---------|-------|-------|-------|-------|-------|----------|-------|
| Control Female-1 | 1.69          | 75.077  | 0.061 | 0.089 | 0.173 | 0.043 | 0.015 | 0.014    | 0.467 |
| Control Female-2 | 0.73          | 171.422 | 0.130 | 0.246 | 0.339 | 0.063 | 0.029 | 0.038    | 0.546 |
| Control Female-3 | 2.11          | 120.529 | 0.078 | 0.123 | 0.174 | 0.037 | 0.018 | 0.022    | 0.370 |
| Control Female-4 | 2.29          | 188.797 | 0.134 | 0.128 | 0.441 | 0.122 | 0.030 | 0.033    | 0.570 |
| Control Female-5 | 0.79          | 86.005  | 0.076 | 0.077 | 0.292 | 0.062 | 0.018 | 0.017    | 0.684 |
| Control Female-6 | 1.47          | 146.450 | 0.086 | 0.097 | 0.358 | 0.064 | 0.021 | 0.021    | 0.646 |
| Control Male-1   | 1.07          | 216.173 | 0.134 | 0.103 | 0.354 | 0.123 | 0.038 | 0.022    | 0.912 |
| Control Male-2   | 1.41          | 348.951 | 0.183 | 0.235 | 0.562 | 0.157 | 0.045 | 0.051    | 0.665 |
| Control Male-3   | 2.55          | 159.890 | 0.148 | 0.054 | 0.324 | 0.167 | 0.046 | 0.018    | 0.676 |
| Control Male-4   | 1.01          | 323.658 | 0.166 | 0.106 | 0.447 | 0.159 | 0.041 | 0.033    | 0.658 |
| Control Male-5   | 1.59          | 139.412 | 0.110 | 0.045 | 0.279 | 0.150 | 0.044 | 0.016    | 0.580 |
| Control Male-6   | 1.69          | 445.442 | 0.274 | 0.155 | 0.700 | 0.308 | 0.083 | 0.041    | 1.081 |
| LS_1 Female-1    | 1.02          | 121.604 | 0.439 | 0.182 | 1.293 | 0.242 | 0.072 | 0.047    | 1.293 |
| LS_1 Female-2    | 0.88          | 138.567 | 0.222 | 0.162 | 1.047 | 0.189 | 0.041 | 0.046    | 1.117 |
| LS_1 Female-3    | 1.53          | 143.283 | 0.184 | 0.199 | 0.918 | 0.128 | 0.037 | 0.050    | 1.045 |
| LS_1 Male-1      | 0.91          | 256.750 | 0.153 | 0.144 | 0.550 | 0.126 | 0.037 | 0.036    | 0.738 |
| LS_1 Male-2      | 0.93          | 338.530 | 0.176 | 0.195 | 0.439 | 0.130 | 0.057 | 0.047    | 0.620 |
| LS_1 Male-3      | 0.80          | 172.274 | 0.114 | 0.098 | 0.398 | 0.097 | 0.027 | 0.025    | 0.666 |
| LS_7 Female-1    | 0.96          | 144.471 | 0.175 | 0.128 | 0.354 | 0.144 | 0.064 | 0.030    | 0.454 |
| LS_7 Female-2    | 0.87          | 270.364 | 0.256 | 0.189 | 0.622 | 0.213 | 0.069 | 0.050    | 0.895 |
| LS_7 Female-3    | 1.02          | 216.728 | 0.140 | 0.175 | 0.515 | 0.128 | 0.032 | 0.035    | 0.833 |
| LS_7 Female-4    | 1.31          | 156.385 | 0.140 | 0.076 | 0.407 | 0.140 | 0.038 | 0.026    | 0.624 |
| LS_7 Male-1      | 1.64          | 291.255 | 0.175 | 0.069 | 0.400 | 0.186 | 0.048 | 0.024    | 0.659 |
| LS_7 Male-2      | 1.20          | 338.925 | 0.151 | 0.117 | 0.446 | 0.132 | 0.036 | 0.030    | 0.664 |

**Table S3: Metabolite concentrations ( $\mu\text{mol/L}$  of extract) in rat retina.***(cont.)*

| Sample ID        | C16-OH | C16:1 | C16:2 | C18   | C18:1 | C18:2 | C2     |
|------------------|--------|-------|-------|-------|-------|-------|--------|
| Control Female-1 | 0.029  | 0.096 | 0.020 | 0.419 | 0.860 | 0.088 | 20.865 |
| Control Female-2 | 0.070  | 0.119 | 0.036 | 0.514 | 0.589 | 0.198 | 64.379 |
| Control Female-3 | 0.074  | 0.064 | 0.020 | 0.370 | 0.442 | 0.093 | 33.776 |
| Control Female-4 | 0.101  | 0.142 | 0.050 | 0.543 | 0.580 | 0.196 | 46.452 |
| Control Female-5 | 0.052  | 0.112 | 0.024 | 0.709 | 0.722 | 0.141 | 28.313 |
| Control Female-6 | 0.036  | 0.107 | 0.032 | 0.584 | 0.688 | 0.183 | 47.433 |
| Control Male-1   | 0.041  | 0.155 | 0.043 | 0.663 | 0.894 | 0.144 | 55.080 |
| Control Male-2   | 0.093  | 0.151 | 0.058 | 0.484 | 0.574 | 0.188 | 94.244 |
| Control Male-3   | 0.032  | 0.149 | 0.035 | 0.710 | 1.140 | 0.112 | 44.135 |
| Control Male-4   | 0.086  | 0.134 | 0.057 | 0.568 | 0.670 | 0.202 | 79.670 |
| Control Male-5   | 0.031  | 0.143 | 0.029 | 0.771 | 1.692 | 0.110 | 32.229 |
| Control Male-6   | 0.137  | 0.211 | 0.085 | 1.062 | 1.101 | 0.266 | 92.065 |
| LS_1 Female-1    | 0.091  | 0.153 | 0.073 | 2.191 | 0.569 | 0.218 | 42.397 |
| LS_1 Female-2    | 0.180  | 0.172 | 0.068 | 1.472 | 0.599 | 0.226 | 40.174 |
| LS_1 Female-3    | 0.117  | 0.145 | 0.052 | 1.632 | 0.597 | 0.173 | 44.355 |
| LS_1 Male-1      | 0.067  | 0.112 | 0.053 | 1.053 | 0.650 | 0.178 | 63.253 |
| LS_1 Male-2      | 0.067  | 0.115 | 0.055 | 0.635 | 0.701 | 0.190 | 80.472 |
| LS_1 Male-3      | 0.041  | 0.114 | 0.042 | 0.816 | 0.698 | 0.169 | 42.808 |
| LS_7 Female-1    | 0.053  | 0.117 | 0.045 | 0.533 | 0.449 | 0.130 | 49.204 |
| LS_7 Female-2    | 0.085  | 0.205 | 0.065 | 0.862 | 0.910 | 0.291 | 88.273 |
| LS_7 Female-3    | 0.115  | 0.152 | 0.058 | 0.747 | 0.717 | 0.251 | 63.541 |
| LS_7 Female-4    | 0.048  | 0.124 | 0.041 | 0.584 | 0.571 | 0.160 | 44.703 |
| LS_7 Male-1      | 0.070  | 0.131 | 0.046 | 0.702 | 0.617 | 0.162 | 68.997 |
| LS_7 Male-2      | 0.054  | 0.128 | 0.047 | 0.565 | 0.630 | 0.162 | 80.526 |

**Table S3: Metabolite concentrations ( $\mu\text{mol/L}$  of extract) in rat retina.***(cont.)*

| Sample ID        | C3    | C3-DC (C4-OH) | C3:1  | C4    | C4:1  | C6 (C4:1-DC) | C5    |
|------------------|-------|---------------|-------|-------|-------|--------------|-------|
| Control Female-1 | 1.192 | 0.166         | 0.018 | 1.336 | 0.020 | 0.086        | 0.515 |
| Control Female-2 | 2.933 | 0.537         | 0.034 | 2.946 | 0.057 | 0.130        | 1.295 |
| Control Female-3 | 2.145 | 0.239         | 0.024 | 1.709 | 0.031 | 0.076        | 0.919 |
| Control Female-4 | 3.112 | 0.433         | 0.036 | 2.972 | 0.045 | 0.178        | 1.449 |
| Control Female-5 | 1.350 | 0.222         | 0.027 | 1.620 | 0.029 | 0.074        | 0.625 |
| Control Female-6 | 1.761 | 0.417         | 0.024 | 2.063 | 0.042 | 0.095        | 0.878 |
| Control Male-1   | 4.501 | 0.402         | 0.024 | 3.725 | 0.025 | 0.180        | 1.937 |
| Control Male-2   | 5.907 | 0.728         | 0.033 | 6.072 | 0.047 | 0.271        | 3.228 |
| Control Male-3   | 2.715 | 0.368         | 0.018 | 3.255 | 0.022 | 0.139        | 1.405 |
| Control Male-4   | 4.581 | 0.662         | 0.028 | 4.403 | 0.040 | 0.203        | 2.675 |
| Control Male-5   | 2.240 | 0.255         | 0.018 | 2.130 | 0.017 | 0.164        | 1.057 |
| Control Male-6   | 4.911 | 0.751         | 0.033 | 6.220 | 0.039 | 0.367        | 3.611 |
| LS_1 Female-1    | 2.695 | 0.332         | 0.026 | 3.276 | 0.041 | 0.305        | 1.764 |
| LS_1 Female-2    | 2.052 | 0.390         | 0.028 | 2.847 | 0.054 | 0.216        | 1.515 |
| LS_1 Female-3    | 2.454 | 0.384         | 0.032 | 2.878 | 0.037 | 0.223        | 1.582 |
| LS_1 Male-1      | 4.082 | 0.464         | 0.029 | 4.968 | 0.038 | 0.196        | 2.745 |
| LS_1 Male-2      | 5.141 | 0.694         | 0.034 | 6.964 | 0.042 | 0.241        | 3.750 |
| LS_1 Male-3      | 2.643 | 0.363         | 0.024 | 4.020 | 0.022 | 0.146        | 1.925 |
| LS_7 Female-1    | 2.397 | 0.363         | 0.032 | 2.596 | 0.049 | 0.195        | 1.204 |
| LS_7 Female-2    | 4.830 | 0.629         | 0.047 | 4.980 | 0.069 | 0.278        | 2.403 |
| LS_7 Female-3    | 4.147 | 0.505         | 0.031 | 3.389 | 0.066 | 0.191        | 1.960 |
| LS_7 Female-4    | 2.388 | 0.329         | 0.028 | 2.426 | 0.046 | 0.166        | 1.396 |
| LS_7 Male-1      | 5.001 | 0.482         | 0.027 | 4.976 | 0.036 | 0.232        | 3.419 |
| LS_7 Male-2      | 4.921 | 0.625         | 0.034 | 4.847 | 0.034 | 0.201        | 3.423 |

**Table S3: Metabolite concentrations ( $\mu\text{mol/L}$  of extract) in rat retina.***(cont.)*

| Sample ID        | C5-OH (C3-DC-M) | C5:1  | C5-DC (C6-OH) | C8    | Ala     | Arg     | Asn     |
|------------------|-----------------|-------|---------------|-------|---------|---------|---------|
| Control Female-1 | 0.237           | 0.039 | 0.069         | 0.096 | 403.758 | 169.360 | 49.324  |
| Control Female-2 | 0.503           | 0.105 | 0.146         | 0.973 | 778.383 | 252.689 | 104.631 |
| Control Female-3 | 0.347           | 0.061 | 0.101         | 0.471 | 555.661 | 156.620 | 62.852  |
| Control Female-4 | 0.433           | 0.080 | 0.112         | 0.562 | 535.547 | 149.542 | 74.023  |
| Control Female-5 | 0.284           | 0.047 | 0.096         | 0.113 | 484.013 | 129.321 | 64.033  |
| Control Female-6 | 0.397           | 0.068 | 0.110         | 0.208 | 454.766 | 168.388 | 81.230  |
| Control Male-1   | 0.557           | 0.076 | 0.071         | 0.263 | 518.814 | 183.599 | 88.838  |
| Control Male-2   | 0.793           | 0.151 | 0.144         | 1.129 | 695.155 | 381.923 | 97.542  |
| Control Male-3   | 0.416           | 0.069 | 0.069         | 0.096 | 356.677 | 79.945  | 62.915  |
| Control Male-4   | 0.740           | 0.120 | 0.112         | 0.403 | 479.441 | 198.463 | 85.360  |
| Control Male-5   | 0.323           | 0.047 | 0.053         | 0.087 | 261.593 | 66.181  | 27.452  |
| Control Male-6   | 0.840           | 0.136 | 0.149         | 0.568 | 596.238 | 214.289 | 111.113 |
| LS_1 Female-1    | 0.377           | 0.093 | 0.162         | 0.633 | 938.874 | 351.667 | 177.477 |
| LS_1 Female-2    | 0.411           | 0.093 | 0.110         | 0.738 | 646.645 | 327.619 | 107.416 |
| LS_1 Female-3    | 0.460           | 0.103 | 0.147         | 0.735 | 864.680 | 341.386 | 150.758 |
| LS_1 Male-1      | 0.765           | 0.118 | 0.147         | 0.801 | 635.480 | 268.554 | 113.127 |
| LS_1 Male-2      | 0.960           | 0.158 | 0.181         | 1.001 | 868.551 | 452.513 | 148.178 |
| LS_1 Male-3      | 0.514           | 0.086 | 0.085         | 0.335 | 659.080 | 225.131 | 118.765 |
| LS_7 Female-1    | 0.414           | 0.083 | 0.113         | 0.248 | 563.229 | 99.978  | 84.380  |
| LS_7 Female-2    | 0.752           | 0.122 | 0.255         | 0.793 | 737.147 | 227.614 | 98.671  |
| LS_7 Female-3    | 0.678           | 0.107 | 0.212         | 0.764 | 529.998 | 168.457 | 83.145  |
| LS_7 Female-4    | 0.442           | 0.073 | 0.130         | 0.248 | 402.023 | 98.408  | 108.325 |
| LS_7 Male-1      | 0.684           | 0.100 | 0.104         | 0.106 | 376.738 | 89.758  | 63.502  |
| LS_7 Male-2      | 0.814           | 0.131 | 0.112         | 0.490 | 401.381 | 112.420 | 82.025  |

**Table S3: Metabolite concentrations ( $\mu\text{mol/L}$  of extract) in rat retina.***(cont.)*

| Sample ID        | Cit    | Gly      | His     | Ile     | Leu     | Met    | Orn    |
|------------------|--------|----------|---------|---------|---------|--------|--------|
| Control Female-1 | 17.765 | 580.539  | 47.578  | 95.593  |         | 50.197 | 13.488 |
| Control Female-2 | 35.935 | 1333.280 | 96.504  | 215.865 | 534.583 | 39.618 | 41.522 |
| Control Female-3 | 31.733 | 639.418  | 67.755  | 121.210 | 406.531 | 40.857 | 17.296 |
| Control Female-4 | 31.591 | 1046.790 | 46.265  | 165.431 | 316.842 | 26.731 | 17.665 |
| Control Female-5 | 18.833 | 1016.990 | 64.033  | 118.021 | 382.314 | 44.886 | 16.134 |
| Control Female-6 | 24.725 | 990.169  | 68.185  | 116.804 | 332.626 | 53.066 | 24.606 |
| Control Male-1   | 16.939 | 912.071  | 108.975 | 166.423 |         | 91.207 | 25.645 |
| Control Male-2   | 32.560 | 1134.780 | 108.944 | 232.176 | 611.351 | 11.471 | 43.550 |
| Control Male-3   | 13.529 |          | 37.796  | 87.514  | 262.068 | 31.032 | 9.461  |
| Control Male-4   | 26.960 | 1337.310 | 69.427  | 140.133 | 364.916 | 47.588 | 27.529 |
| Control Male-5   | 6.344  | 599.157  | 33.600  | 50.517  | 133.538 | 33.052 | 7.910  |
| Control Male-6   | 26.786 | 1140.890 | 61.509  | 155.756 | 323.417 | 12.203 | 22.917 |
| LS_1 Female-1    | 53.134 | 1457.060 | 127.082 | 230.063 | 737.296 | 27.169 | 42.288 |
| LS_1 Female-2    | 38.240 | 1036.560 | 77.017  | 171.866 | 481.224 | 12.675 | 24.383 |
| LS_1 Female-3    | 48.716 | 1198.590 | 104.908 | 189.382 | 485.915 | 73.012 | 31.148 |
| LS_1 Male-1      | 24.003 | 1200.130 | 120.997 | 182.971 | 430.867 | 74.172 | 37.184 |
| LS_1 Male-2      | 48.557 | 1208.220 | 89.591  | 218.847 | 582.453 | 69.986 | 39.324 |
| LS_1 Male-3      | 25.515 | 1226.800 | 95.273  | 150.740 |         | 59.839 | 22.774 |
| LS_7 Female-1    | 25.544 | 1109.710 | 67.525  | 118.299 | 240.785 | 20.205 | 15.494 |
| LS_7 Female-2    | 25.303 | 1941.080 | 116.696 | 209.128 | 485.269 | 80.647 | 28.192 |
| LS_7 Female-3    | 29.948 | 1714.120 | 73.687  | 146.784 | 318.196 | 53.591 | 24.431 |
| LS_7 Female-4    | 32.345 |          | 54.620  | 108.325 | 227.330 | 13.579 | 16.630 |
| LS_7 Male-1      | 19.906 |          | 45.551  | 79.988  | 147.154 | 24.424 | 10.319 |
| LS_7 Male-2      | 26.398 | 1282.420 | 59.041  | 119.082 | 258.149 | 24.732 | 16.821 |

**Table S3: Metabolite concentrations ( $\mu\text{mol/L}$  of extract) in rat retina.***(cont.)*

| Sample ID        | Phe     | Pro     | Ser     | Thr     | Trp    | Tyr     | Val     |
|------------------|---------|---------|---------|---------|--------|---------|---------|
| Control Female-1 | 84.244  | 154.519 | 219.121 | 191.185 | 44.523 | 156.702 | 169.797 |
| Control Female-2 | 152.375 | 316.179 | 344.114 | 394.906 | 76.061 | 184.120 | 307.290 |
| Control Female-3 | 78.310  | 204.968 | 279.873 | 223.354 | 42.015 | 125.977 | 155.939 |
| Control Female-4 | 74.397  | 185.993 | 373.855 | 243.006 | 45.517 | 132.718 | 184.123 |
| Control Female-5 | 95.422  | 170.754 | 260.526 | 271.198 | 41.998 | 105.466 | 214.071 |
| Control Female-6 | 113.840 | 173.131 | 308.316 | 144.079 | 42.749 | 148.822 | 170.167 |
| Control Male-1   | 107.790 | 161.685 | 197.221 | 217.949 | 64.556 | 241.047 | 273.029 |
| Control Male-2   | 163.485 | 320.101 | 417.642 | 295.372 | 60.860 | 266.522 | 287.129 |
| Control Male-3   | 83.729  | 149.956 | 193.003 | 152.321 | 35.479 | 170.297 | 145.225 |
| Control Male-4   | 118.793 | 194.195 | 247.545 | 190.638 | 54.275 | 230.473 | 194.195 |
| Control Male-5   | 60.307  | 101.034 | 140.978 | 111.216 | 25.376 | 198.544 | 86.937  |
| Control Male-6   | 123.017 | 299.607 | 415.680 | 244.051 | 49.207 | 213.296 | 250.995 |
| LS_1 Female-1    | 135.846 | 422.877 | 457.934 | 370.291 | 71.758 | 225.680 | 318.801 |
| LS_1 Female-2    | 110.639 | 369.511 | 380.253 | 286.801 | 65.309 | 148.234 | 244.909 |
| LS_1 Female-3    | 134.561 | 416.143 | 647.887 | 322.697 | 79.117 | 218.039 | 277.844 |
| LS_1 Male-1      | 126.899 | 288.228 | 357.088 | 220.352 | 66.401 | 207.564 | 257.733 |
| LS_1 Male-2      | 145.898 | 372.725 | 479.869 | 279.259 | 59.613 | 234.805 | 322.572 |
| LS_1 Male-3      | 128.553 | 237.530 | 649.944 | 195.766 | 49.855 | 258.411 | 239.487 |
| LS_7 Female-1    | 92.650  | 213.566 | 539.150 | 183.206 | 39.363 | 139.237 | 187.394 |
| LS_7 Female-2    | 119.006 | 377.817 | 451.762 | 317.736 | 65.049 | 143.270 | 306.182 |
| LS_7 Female-3    | 120.185 | 278.791 | 330.017 | 241.356 | 59.009 | 122.156 | 215.743 |
| LS_7 Female-4    | 77.048  | 152.571 | 306.667 | 175.456 | 32.879 | 116.716 | 144.179 |
| LS_7 Male-1      | 68.997  | 152.649 | 176.462 | 132.499 | 29.187 | 115.403 | 130.668 |
| LS_7 Male-2      | 106.591 | 169.046 | 209.018 | 162.384 | 45.301 | 181.537 | 192.363 |

**Table S3: Metabolite concentrations ( $\mu\text{mol/L}$  of extract) in rat retina.***(cont.)*

| Sample ID        | Ac-Orn | ADMA  | c4-OH-Pro | Carnosine | Creatinine | Dopamine | Histamine |
|------------------|--------|-------|-----------|-----------|------------|----------|-----------|
| Control Female-1 | 1.152  | 0.594 | 17.547    | 0.089     | 21.170     | 0.066    | 0.252     |
| Control Female-2 | 1.575  | 1.117 | 25.015    | 0.262     | 46.982     | 0.190    | 0.747     |
| Control Female-3 | 0.688  | 0.695 | 19.407    | 0.185     | 29.485     | 0.119    | 0.406     |
| Control Female-4 | 1.028  | 0.745 | 12.805    | 0.272     | 43.180     | 0.149    | 0.555     |
| Control Female-5 | 1.180  | 0.684 | 12.932    | 0.145     | 26.994     | 0.099    | 0.383     |
| Control Female-6 | 2.164  | 0.978 | 22.768    | 0.140     | 30.357     | 0.095    | 0.343     |
| Control Male-1   | 4.223  | 0.588 | 23.749    | 0.158     | 23.039     | 0.102    | 0.376     |
| Control Male-2   | 1.841  | 0.904 | 29.675    | 0.290     | 46.161     | 0.000    | 0.765     |
| Control Male-3   | 2.564  | 0.465 | 14.854    | 0.099     | 33.634     | 0.076    | 0.286     |
| Control Male-4   | 3.749  | 0.747 | 17.997    | 0.196     | 36.136     | 0.127    | 0.437     |
| Control Male-5   | 2.428  | 0.207 | 9.203     | 0.128     | 22.204     | 0.080    | 0.240     |
| Control Male-6   | 3.234  | 0.736 | 28.969    | 0.201     | 40.675     | 0.137    | 0.571     |
| LS_1 Female-1    | 0.879  | 2.432 | 39.111    | 0.348     | 34.619     | 0.164    | 0.633     |
| LS_1 Female-2    | 0.795  | 1.364 | 20.194    | 0.267     | 37.273     | 0.149    | 0.613     |
| LS_1 Female-3    | 1.179  | 2.031 | 27.411    | 0.269     | 41.365     | 0.176    | 0.688     |
| LS_1 Male-1      | 3.168  | 1.643 | 18.986    | 0.191     | 33.250     | 0.155    | 0.570     |
| LS_1 Male-2      | 1.767  | 1.379 | 26.444    | 0.284     | 39.324     | 0.174    | 0.657     |
| LS_1 Male-3      | 3.380  | 1.194 | 11.877    | 0.155     | 26.167     | 0.104    | 0.380     |
| LS_7 Female-1    | 1.057  | 0.516 | 15.285    | 0.394     | 32.663     | 0.181    | 0.762     |
| LS_7 Female-2    | 1.583  | 1.130 | 28.654    | 0.255     | 51.069     | 0.267    | 0.757     |
| LS_7 Female-3    | 1.162  | 0.945 | 16.944    | 0.204     | 43.444     | 0.156    | 0.577     |
| LS_7 Female-4    | 1.533  | 0.564 | 9.917     | 0.159     | 32.421     | 0.134    | 0.468     |
| LS_7 Male-1      | 2.155  | 0.609 | 16.303    | 0.138     | 42.742     | 0.125    | 0.374     |
| LS_7 Male-2      | 2.581  | 0.366 | 17.654    | 0.177     | 33.559     | 0.157    | 0.470     |

**Table S3: Metabolite concentrations ( $\mu\text{mol/L}$  of extract) in rat retina.***(cont.)*

| Sample ID        | Kynurenine | Met-SO | PEA   | Putrescine | SDMA  | Serotonin | Spermidine |
|------------------|------------|--------|-------|------------|-------|-----------|------------|
| Control Female-1 | 0.243      | 3.322  | 0.015 | 2.017      | 1.131 | 0.017     | 8.424      |
| Control Female-2 | 0.340      | 37.586 | 0.050 | 10.222     | 1.333 | 0.052     | 19.428     |
| Control Female-3 | 0.466      | 7.422  | 0.035 | 3.956      | 0.851 | 0.031     | 12.462     |
| Control Female-4 | 0.150      | 50.844 | 0.051 | 3.823      | 0.446 | 0.035     | 13.085     |
| Control Female-5 | 0.129      | 10.044 | 0.030 | 0.414      | 0.747 | 0.020     | 10.358     |
| Control Female-6 | 0.176      | 10.495 | 0.027 | 3.018      | 0.493 | 0.000     | 11.562     |
| Control Male-1   | 0.187      | 5.911  | 0.036 | 3.163      | 0.888 | 0.024     | 11.549     |
| Control Male-2   | 0.297      | 75.011 | 0.016 | 9.988      | 0.606 | 0.052     | 14.563     |
| Control Male-3   | 0.099      | 15.327 | 0.075 | 0.000      | 0.081 | 0.019     | 2.422      |
| Control Male-4   | 0.300      | 16.290 | 0.037 | 3.841      | 0.825 | 0.025     | 11.310     |
| Control Male-5   | 0.134      | 5.757  | 0.065 | 0.085      | 0.105 | 0.013     | 2.228      |
| Control Male-6   | 0.261      |        | 0.032 | 3.135      | 0.455 | 0.035     | 12.203     |
| LS_1 Female-1    | 0.451      | 78.112 | 0.043 | 3.604      | 0.784 | 0.046     | 8.940      |
| LS_1 Female-2    | 0.202      | 58.649 | 0.020 | 8.121      | 0.842 | 0.048     | 11.064     |
| LS_1 Female-3    | 0.320      | 21.181 | 0.032 | 8.771      | 1.458 | 0.044     | 12.958     |
| LS_1 Male-1      | 0.205      | 12.690 | 0.052 | 8.047      | 0.743 | 0.036     | 13.379     |
| LS_1 Male-2      | 0.269      | 23.936 | 0.041 | 9.198      | 1.091 | 0.046     | 16.642     |
| LS_1 Male-3      | 0.135      | 11.289 | 0.039 | 4.222      | 0.446 | 0.023     | 11.942     |
| LS_7 Female-1    | 0.183      | 43.132 | 0.137 | 2.083      | 0.389 | 0.046     | 6.585      |
| LS_7 Female-2    | 0.403      | 17.793 | 0.106 | 9.393      | 0.653 | 0.046     | 15.482     |
| LS_7 Female-3    | 0.221      | 13.890 | 0.068 | 6.462      | 0.911 | 0.037     | 15.565     |
| LS_7 Female-4    | 0.114      |        | 0.023 | 1.404      | 0.349 | 0.027     | 8.239      |
| LS_7 Male-1      | 0.079      | 18.990 | 0.054 | 0.000      | 0.562 | 0.023     | 4.128      |
| LS_7 Male-2      | 0.302      | 32.394 | 0.022 | 3.339      | 0.594 | 0.028     | 12.325     |



**Table S3: Metabolite concentrations ( $\mu\text{mol/L}$  of extract) in rat retina.***(cont.)*

| Sample ID        | Spermine | t4-OH-Pro | Taurine | total DMA | lysoPC a C16:0 | lysoPC a C16:1 | lysoPC a C17:0 |
|------------------|----------|-----------|---------|-----------|----------------|----------------|----------------|
| Control Female-1 | 14.928   | 16.718    | 44.086  | 1.458     | 10.345         | 0.624          | 0.108          |
| Control Female-2 | 47.109   | 20.698    | 135.868 | 1.486     | 27.682         | 1.030          | 0.342          |
| Control Female-3 | 31.596   | 15.185    | 67.347  | 1.103     | 13.006         | 0.673          | 0.159          |
| Control Female-4 | 26.544   | 11.496    | 108.418 | 0.807     | 20.749         | 0.821          | 0.255          |
| Control Female-5 | 22.977   | 13.309    | 99.816  | 0.785     | 15.255         | 0.753          | 0.175          |
| Control Female-6 | 26.148   | 17.728    | 56.505  | 1.109     | 19.151         | 0.777          | 0.224          |
| Control Male-1   | 18.715   | 19.900    | 59.225  | 1.338     | 13.918         | 0.776          | 0.179          |
| Control Male-2   | 27.889   | 34.620    | 186.840 | 1.539     | 37.368         | 1.116          | 0.598          |
| Control Male-3   | 3.255    | 12.015    | 52.035  | 0.639     | 13.482         | 0.539          | 0.170          |
| Control Male-4   | 26.391   | 21.411    | 70.636  | 0.854     | 23.616         | 0.839          | 0.317          |
| Control Male-5   | 4.503    | 8.380     | 66.965  | 0.326     | 8.733          | 0.384          | 0.121          |
| Control Male-6   | 26.885   | 25.794    | 157.740 | 1.111     | 25.596         | 0.954          | 0.320          |
| LS_1 Female-1    | 15.118   | 34.838    | 83.261  | 3.133     | 24.211         | 0.803          | 0.353          |
| LS_1 Female-2    | 14.179   | 20.302    | 272.837 | 2.148     | 24.813         | 0.930          | 0.345          |
| LS_1 Female-3    | 24.047   | 24.047    | 175.677 | 3.551     | 26.289         | 1.079          | 0.328          |
| LS_1 Male-1      | 33.053   | 17.117    | 156.411 | 1.928     | 25.085         | 0.913          | 0.326          |
| LS_1 Male-2      | 36.589   | 20.175    | 120.822 | 2.131     | 29.180         | 1.067          | 0.337          |
| LS_1 Male-3      | 28.060   | 10.702    | 77.001  | 1.638     | 18.337         | 0.816          | 0.243          |
| LS_7 Female-1    | 12.039   | 15.285    | 258.583 | 0.578     | 20.624         | 0.550          | 0.320          |
| LS_7 Female-2    | 25.188   | 27.961    | 129.405 | 1.363     | 31.427         | 1.133          | 0.404          |
| LS_7 Female-3    | 38.420   | 14.481    | 136.933 | 1.034     | 25.712         | 1.025          | 0.273          |
| LS_7 Female-4    | 21.665   | 8.468     | 127.396 | 0.632     | 18.919         | 0.701          | 0.186          |
| LS_7 Male-1      | 7.083    | 17.341    | 94.643  | 0.684     | 17.952         | 0.518          | 0.218          |
| LS_7 Male-2      | 29.562   | 22.734    | 119.915 | 0.660     | 22.401         | 0.796          | 0.306          |

**Table S3: Metabolite concentrations ( $\mu\text{mol/L}$  of extract) in rat retina.***(cont.)*

| Sample ID        | lysoPC a C18:0 | lysoPC a C18:1 | lysoPC a C18:2 | lysoPC a C20:3 | lysoPC a C20:4 | lysoPC a C24:0 | lysoPC a C26:0 |
|------------------|----------------|----------------|----------------|----------------|----------------|----------------|----------------|
| Control Female-1 | 4.496          | 5.413          | 0.284          | 0.110          | 1.672          | 0.115          | 0.111          |
| Control Female-2 | 15.492         | 12.025         | 0.978          | 0.223          | 4.698          | 0.395          | 0.291          |
| Control Female-3 | 6.455          | 7.014          | 0.449          | 0.150          | 2.492          | 0.185          | 0.147          |
| Control Female-4 | 13.178         | 8.907          | 0.609          | 0.195          | 2.963          | 0.303          | 0.294          |
| Control Female-5 | 7.973          | 6.968          | 0.486          | 0.123          | 2.090          | 0.214          | 0.206          |
| Control Female-6 | 8.716          | 8.419          | 0.694          | 0.187          | 3.386          | 0.209          | 0.185          |
| Control Male-1   | 6.989          | 6.515          | 0.467          | 0.147          | 2.268          | 0.288          | 0.245          |
| Control Male-2   | 26.790         | 12.832         | 1.158          | 0.279          | 4.630          | 0.475          | 0.468          |
| Control Male-3   | 7.096          | 6.055          | 0.343          | 0.118          | 2.238          | 0.322          | 0.375          |
| Control Male-4   | 13.089         | 9.888          | 0.768          | 0.203          | 4.232          | 0.351          | 0.353          |
| Control Male-5   | 4.034          | 3.697          | 0.230          | 0.095          | 1.234          | 0.268          | 0.278          |
| Control Male-6   | 15.476         | 10.318         | 0.670          | 0.239          | 3.790          | 0.389          | 0.420          |
| LS_1 Female-1    | 18.076         | 8.589          | 1.621          | 0.213          | 3.703          | 0.438          | 0.298          |
| LS_1 Female-2    | 16.005         | 9.582          | 1.364          | 0.209          | 3.727          | 0.323          | 0.256          |
| LS_1 Female-3    | 16.696         | 11.899         | 1.123          | 0.245          | 4.498          | 0.358          | 0.248          |
| LS_1 Male-1      | 13.575         | 10.526         | 0.801          | 0.223          | 4.515          | 0.459          | 0.292          |
| LS_1 Male-2      | 16.186         | 12.310         | 0.921          | 0.276          | 5.255          | 0.303          | 0.270          |
| LS_1 Male-3      | 10.245         | 8.353          | 0.563          | 0.193          | 3.374          | 0.232          | 0.216          |
| LS_7 Female-1    | 14.238         | 8.354          | 1.029          | 0.164          | 3.162          | 0.561          | 0.355          |
| LS_7 Female-2    | 18.833         | 13.634         | 1.068          | 0.267          | 4.518          | 0.553          | 0.380          |
| LS_7 Female-3    | 13.201         | 11.526         | 0.745          | 0.209          | 4.354          | 0.414          | 0.313          |
| LS_7 Female-4    | 9.917          | 8.620          | 0.507          | 0.128          | 2.601          | 0.198          | 0.167          |
| LS_7 Male-1      | 8.304          | 7.449          | 0.598          | 0.151          | 2.827          | 0.332          | 0.345          |
| LS_7 Male-2      | 10.576         | 9.493          | 0.600          | 0.207          | 3.889          | 0.312          | 0.301          |

**Table S3: Metabolite concentrations ( $\mu\text{mol/L}$  of extract) in rat retina.***(cont.)*

| Sample ID        | lysoPC a C26:1 | lysoPC a C28:0 | lysoPC a C28:1 | PC aa C24:0 | PC aa C28:1 | PC aa C30:0 | PC aa C30:2 |
|------------------|----------------|----------------|----------------|-------------|-------------|-------------|-------------|
| Control Female-1 | 0.048          | 0.109          | 0.058          | 0.042       | 0.182       | 6.766       | 0.089       |
| Control Female-2 | 0.105          | 0.235          | 0.132          | 0.118       | 0.282       | 10.412      | 0.117       |
| Control Female-3 | 0.061          | 0.161          | 0.089          | 0.069       | 0.195       | 7.422       | 0.073       |
| Control Female-4 | 0.102          | 0.221          | 0.141          | 0.115       | 0.246       | 9.057       | 0.105       |
| Control Female-5 | 0.075          | 0.187          | 0.080          | 0.073       | 0.306       | 9.354       | 0.156       |
| Control Female-6 | 0.058          | 0.143          | 0.069          | 0.065       | 0.212       | 7.767       | 0.097       |
| Control Male-1   | 0.096          | 0.173          | 0.113          | 0.080       | 0.251       | 8.114       | 0.159       |
| Control Male-2   | 0.188          | 0.352          | 0.214          | 0.179       | 0.301       | 6.677       | 0.088       |
| Control Male-3   | 0.109          | 0.180          | 0.135          | 0.089       | 0.325       | 7.096       | 0.150       |
| Control Male-4   | 0.146          | 0.256          | 0.149          | 0.109       | 0.272       | 10.599      | 0.095       |
| Control Male-5   | 0.089          | 0.150          | 0.085          | 0.072       | 0.318       | 9.868       | 0.147       |
| Control Male-6   | 0.136          | 0.274          | 0.157          | 0.140       | 0.375       | 10.417      | 0.210       |
| LS_1 Female-1    | 0.128          | 0.252          | 0.138          | 0.142       | 0.203       | 7.077       | 0.073       |
| LS_1 Female-2    | 0.118          | 0.257          | 0.134          | 0.125       | 0.215       | 7.079       | 0.085       |
| LS_1 Female-3    | 0.111          | 0.247          | 0.143          | 0.120       | 0.247       | 11.052      | 0.071       |
| LS_1 Male-1      | 0.121          | 0.249          | 0.138          | 0.124       | 0.285       | 12.592      | 0.131       |
| LS_1 Male-2      | 0.105          | 0.242          | 0.166          | 0.121       | 0.242       | 11.968      | 0.123       |
| LS_1 Male-3      | 0.080          | 0.170          | 0.113          | 0.078       | 0.245       | 11.420      | 0.147       |
| LS_7 Female-1    | 0.181          | 0.231          | 0.194          | 0.183       | 0.364       | 12.353      | 0.144       |
| LS_7 Female-2    | 0.170          | 0.370          | 0.205          | 0.207       | 0.343       | 13.172      | 0.132       |
| LS_7 Female-3    | 0.117          | 0.264          | 0.157          | 0.150       | 0.313       | 13.398      | 0.117       |
| LS_7 Female-4    | 0.073          | 0.149          | 0.083          | 0.076       | 0.240       | 7.781       | 0.089       |
| LS_7 Male-1      | 0.112          | 0.170          | 0.117          | 0.102       | 0.227       | 6.900       | 0.047       |
| LS_7 Male-2      | 0.134          | 0.240          | 0.170          | 0.109       | 0.306       | 10.742      | 0.127       |

**Table S3: Metabolite concentrations ( $\mu\text{mol/L}$  of extract) in rat retina.***(cont.)*

| Sample ID        | PC aa C32:0 | PC aa C32:1 | PC aa C32:2 | PC aa C32:3 | PC aa C34:1 | PC aa C34:2 | PC aa C34:3 |
|------------------|-------------|-------------|-------------|-------------|-------------|-------------|-------------|
| Control Female-1 | 95.156      | 14.361      | 1.235       | 0.142       | 109.560     | 8.206       | 0.650       |
| Control Female-2 | 273.006     | 27.555      | 1.803       | 0.330       | 306.020     | 18.920      | 1.676       |
| Control Female-3 | 162.068     | 18.045      | 1.566       | 0.185       | 186.582     | 13.143      | 1.008       |
| Control Female-4 | 222.444     | 26.263      | 1.757       | 0.297       | 257.025     | 18.225      | 1.795       |
| Control Female-5 | 135.599     | 23.039      | 2.825       | 0.276       | 168.871     | 15.757      | 1.312       |
| Control Female-6 | 161.273     | 20.218      | 1.660       | 0.247       | 187.361     | 14.052      | 1.316       |
| Control Male-1   | 150.432     | 21.084      | 2.162       | 0.200       | 171.161     | 12.970      | 0.971       |
| Control Male-2   | 177.223     | 18.959      | 1.594       | 0.280       | 228.055     | 14.288      | 1.203       |
| Control Male-3   | 90.352      | 17.976      | 1.604       | 0.243       | 105.489     | 8.515       | 0.984       |
| Control Male-4   | 280.978     | 28.382      | 1.871       | 0.320       | 301.607     | 21.198      | 1.842       |
| Control Male-5   | 98.293      | 21.773      | 1.531       | 0.252       | 115.524     | 11.239      | 1.132       |
| Control Male-6   | 202.384     | 30.258      | 3.512       | 0.418       | 261.908     | 20.338      | 1.964       |
| LS_1 Female-1    | 154.471     | 18.843      | 1.468       | 0.302       | 185.146     | 13.366      | 1.369       |
| LS_1 Female-2    | 168.643     | 19.979      | 1.396       | 0.255       | 207.313     | 16.327      | 1.536       |
| LS_1 Female-3    | 232.990     | 28.158      | 2.018       | 0.339       | 289.057     | 19.686      | 1.744       |
| LS_1 Male-1      | 313.805     | 33.446      | 2.204       | 0.522       | 351.186     | 23.511      | 2.479       |
| LS_1 Male-2      | 327.131     | 30.661      | 1.869       | 0.423       | 368.165     | 22.683      | 2.314       |
| LS_1 Male-3      | 229.699     | 29.300      | 2.486       | 0.374       | 259.064     | 21.534      | 2.029       |
| LS_7 Female-1    | 206.238     | 37.479      | 1.403       | 0.530       | 308.833     | 27.533      | 2.680       |
| LS_7 Female-2    | 313.114     | 37.666      | 2.299       | 0.426       | 388.215     | 25.534      | 2.184       |
| LS_7 Female-3    | 333.958     | 37.435      | 2.256       | 0.451       | 395.036     | 26.795      | 2.532       |
| LS_7 Female-4    | 106.037     | 24.411      | 2.105       | 0.350       | 167.828     | 16.020      | 1.785       |
| LS_7 Male-1      | 97.696      | 22.836      | 0.837       | 0.315       | 156.313     | 13.677      | 1.417       |
| LS_7 Male-2      | 234.833     | 30.229      | 2.273       | 0.342       | 284.797     | 19.986      | 1.974       |

**Table S3: Metabolite concentrations ( $\mu\text{mol/L}$  of extract) in rat retina.***(cont.)*

| Sample ID        | PC aa C34:4 | PC aa C36:0 | PC aa C36:1 | PC aa C36:2 | PC aa C36:3 | PC aa C36:4 | PC aa C36:5 |
|------------------|-------------|-------------|-------------|-------------|-------------|-------------|-------------|
| Control Female-1 | 0.168       | 1.266       | 48.451      | 13.662      | 2.043       | 22.436      | 0.685       |
| Control Female-2 | 0.535       | 3.441       | 135.868     | 34.919      | 5.168       | 72.632      | 2.324       |
| Control Female-3 | 0.238       | 2.172       | 88.524      | 22.948      | 3.228       | 40.857      | 1.137       |
| Control Female-4 | 0.479       | 2.589       | 115.895     | 31.404      | 5.346       | 55.704      | 2.467       |
| Control Female-5 | 0.335       | 1.808       | 71.566      | 22.914      | 3.823       | 37.918      | 1.475       |
| Control Female-6 | 0.348       | 1.820       | 84.194      | 22.887      | 3.706       | 43.224      | 1.376       |
| Control Male-1   | 0.258       | 1.635       | 76.401      | 21.262      | 3.246       | 37.667      | 1.031       |
| Control Male-2   | 0.412       | 1.758       | 85.589      | 25.004      | 4.410       | 50.419      | 1.470       |
| Control Male-3   | 0.373       | 0.462       | 23.889      | 10.123      | 2.351       | 41.344      | 1.509       |
| Control Male-4   | 0.485       | 3.685       | 147.247     | 39.337      | 6.516       | 76.824      | 2.155       |
| Control Male-5   | 0.338       | 0.474       | 31.289      | 13.863      | 3.133       | 39.944      | 1.308       |
| Control Male-6   | 0.568       | 2.093       | 106.152     | 31.548      | 5.655       | 66.172      | 2.302       |
| LS_1 Female-1    | 0.458       | 1.654       | 74.935      | 20.377      | 3.462       | 46.670      | 2.377       |
| LS_1 Female-2    | 0.447       | 2.009       | 84.536      | 24.491      | 4.383       | 44.578      | 2.041       |
| LS_1 Female-3    | 0.525       | 2.828       | 124.469     | 33.142      | 4.921       | 63.418      | 2.878       |
| LS_1 Male-1      | 0.707       | 4.456       | 167.231     | 44.070      | 7.348       | 91.584      | 2.745       |
| LS_1 Male-2      | 0.650       | 3.442       | 173.254     | 42.174      | 7.101       | 97.228      | 2.314       |
| LS_1 Male-3      | 0.523       | 3.041       | 122.680     | 35.173      | 5.945       | 65.908      | 2.003       |
| LS_7 Female-1    | 0.808       | 1.110       | 75.586      | 35.804      | 7.381       | 106.783     | 4.460       |
| LS_7 Female-2    | 0.642       | 3.466       | 174.466     | 45.407      | 7.371       | 79.145      | 3.027       |
| LS_7 Female-3    | 0.635       | 4.325       | 187.174     | 47.779      | 7.960       | 87.578      | 3.231       |
| LS_7 Female-4    | 0.529       | 0.816       | 47.221      | 19.758      | 4.241       | 45.924      | 2.449       |
| LS_7 Male-1      | 0.529       | 0.623       | 36.697      | 16.547      | 4.299       | 57.763      | 2.674       |
| LS_7 Male-2      | 0.523       | 2.515       | 126.577     | 33.976      | 5.721       | 70.283      | 2.390       |

**Table S3: Metabolite concentrations ( $\mu\text{mol/L}$  of extract) in rat retina.***(cont.)*

| Sample ID        | PC aa C36:6 | PC aa C38:0 | PC aa C38:1 | PC aa C38:3 | PC aa C38:4 | PC aa C38:5 | PC aa C38:6 |
|------------------|-------------|-------------|-------------|-------------|-------------|-------------|-------------|
| Control Female-1 | 0.291       | 0.299       | 0.581       | 1.043       | 26.757      | 4.889       | 38.193      |
| Control Female-2 | 0.923       | 0.919       | 1.524       | 2.286       | 78.981      | 15.872      | 118.599     |
| Control Female-3 | 0.439       | 0.547       | 1.062       | 1.621       | 48.688      | 8.989       | 67.755      |
| Control Female-4 | 0.821       | 0.647       | 1.224       | 2.056       | 63.462      | 14.580      | 96.268      |
| Control Female-5 | 0.634       | 0.519       | 0.835       | 1.632       | 38.859      | 9.354       | 61.082      |
| Control Female-6 | 0.640       | 0.534       | 1.026       | 1.719       | 49.924      | 10.139      | 70.557      |
| Control Male-1   | 0.368       | 0.416       | 0.912       | 1.587       | 44.005      | 8.647       | 56.027      |
| Control Male-2   | 0.577       | 0.725       | 0.893       | 2.047       | 50.832      | 11.636      | 68.416      |
| Control Male-3   | 0.591       | 0.299       | 0.274       | 0.447       | 24.835      | 8.941       | 62.915      |
| Control Male-4   | 0.782       | 0.839       | 1.757       | 3.002       | 89.628      | 18.495      | 116.659     |
| Control Male-5   | 0.517       | 0.294       | 0.308       | 0.862       | 30.741      | 10.495      | 60.699      |
| Control Male-6   | 0.875       | 0.665       | 1.210       | 2.044       | 66.767      | 17.758      | 100.200     |
| LS_1 Female-1    | 1.074       | 0.701       | 0.997       | 1.512       | 47.765      | 9.674       | 90.272      |
| LS_1 Female-2    | 0.975       | 0.646       | 1.052       | 1.740       | 50.378      | 10.291      | 79.058      |
| LS_1 Female-3    | 1.383       | 0.922       | 1.508       | 2.093       | 75.878      | 14.328      | 116.121     |
| LS_1 Male-1      | 1.712       | 1.023       | 1.977       | 2.725       | 104.274     | 21.150      | 155.427     |
| LS_1 Male-2      | 1.687       | 0.997       | 1.961       | 3.078       | 108.740     | 22.683      | 162.996     |
| LS_1 Male-3      | 1.305       | 0.842       | 1.527       | 2.708       | 73.739      | 16.640      | 115.502     |
| LS_7 Female-1    | 1.392       | 0.914       | 0.784       | 1.602       | 75.062      | 27.743      | 162.268     |
| LS_7 Female-2    | 1.143       | 1.155       | 2.103       | 2.877       | 93.472      | 20.682      | 129.405     |
| LS_7 Female-3    | 1.074       | 1.162       | 2.187       | 3.625       | 102.453     | 23.446      | 142.843     |
| LS_7 Female-4    | 0.877       | 0.442       | 0.529       | 0.999       | 33.871      | 12.969      | 80.100      |
| LS_7 Male-1      | 0.775       | 0.470       | 0.387       | 0.775       | 35.170      | 16.303      | 89.758      |
| LS_7 Male-2      | 0.849       | 0.784       | 1.307       | 2.115       | 73.115      | 18.487      | 102.427     |

**Table S3: Metabolite concentrations ( $\mu\text{mol/L}$  of extract) in rat retina.***(cont.)*

| Sample ID        | PC aa C40:2 | PC aa C40:3 | PC aa C40:4 | PC aa C40:5 | PC aa C40:6 | PC aa C42:0 | PC aa C42:1 |
|------------------|-------------|-------------|-------------|-------------|-------------|-------------|-------------|
| Control Female-1 | 0.137       | 0.062       | 2.086       | 1.641       | 103.886     | 0.042       | 0.038       |
| Control Female-2 | 0.353       | 0.104       | 5.727       | 4.800       | 307.290     | 0.140       | 0.105       |
| Control Female-3 | 0.204       | 0.112       | 3.691       | 3.779       | 176.368     | 0.076       | 0.058       |
| Control Female-4 | 0.293       | 0.140       | 4.757       | 5.645       | 223.378     | 0.137       | 0.099       |
| Control Female-5 | 0.208       | 0.090       | 2.894       | 2.593       | 126.810     | 0.080       | 0.068       |
| Control Female-6 | 0.188       | 0.116       | 3.688       | 4.204       | 167.795     | 0.092       | 0.063       |
| Control Male-1   | 0.252       | 0.147       | 3.400       | 3.719       | 152.209     | 0.094       | 0.082       |
| Control Male-2   | 0.466       | 0.195       | 4.341       | 2.116       | 164.859     | 0.218       | 0.179       |
| Control Male-3   | 0.191       | 0.125       | 1.504       | 1.348       | 78.526      | 0.117       | 0.101       |
| Control Male-4   | 0.422       | 0.230       | 6.829       | 8.394       | 252.525     | 0.170       | 0.124       |
| Control Male-5   | 0.176       | 0.126       | 1.809       | 2.260       | 81.454      | 0.105       | 0.092       |
| Control Male-6   | 0.353       | 0.188       | 4.950       | 3.750       | 186.510     | 0.177       | 0.150       |
| LS_1 Female-1    | 0.273       | 0.103       | 3.232       | 2.191       | 168.713     | 0.113       | 0.104       |
| LS_1 Female-2    | 0.228       | 0.121       | 3.781       | 2.299       | 170.792     | 0.122       | 0.090       |
| LS_1 Female-3    | 0.310       | 0.189       | 5.333       | 4.847       | 259.155     | 0.122       | 0.110       |
| LS_1 Male-1      | 0.415       | 0.277       | 7.565       | 10.919      | 322.658     | 0.140       | 0.109       |
| LS_1 Male-2      | 0.463       | 0.173       | 8.594       | 9.335       | 340.809     | 0.144       | 0.146       |
| LS_1 Male-3      | 0.331       | 0.162       | 5.501       | 8.222       | 234.267     | 0.098       | 0.095       |
| LS_7 Female-1    | 0.326       | 0.220       | 4.188       | 5.549       | 205.191     | 0.151       | 0.107       |
| LS_7 Female-2    | 0.453       | 0.246       | 7.244       | 6.678       | 272.675     | 0.198       | 0.172       |
| LS_7 Female-3    | 0.374       | 0.213       | 7.901       | 10.935      | 314.255     | 0.155       | 0.128       |
| LS_7 Female-4    | 0.133       | 0.071       | 2.075       | 1.564       | 95.357      | 0.080       | 0.047       |
| LS_7 Male-1      | 0.230       | 0.172       | 2.125       | 2.461       | 90.979      | 0.135       | 0.109       |
| LS_7 Male-2      | 0.401       | 0.241       | 5.779       | 5.779       | 182.370     | 0.157       | 0.127       |

**Table S3: Metabolite concentrations ( $\mu\text{mol/L}$  of extract) in rat retina.***(cont.)*

| Sample ID        | PC aa C42:2 | PC aa C42:4 | PC aa C42:5 | PC aa C42:6 | PC ae C30:0 | PC ae C30:1 | PC ae C30:2 |
|------------------|-------------|-------------|-------------|-------------|-------------|-------------|-------------|
| Control Female-1 | 0.082       | 0.293       | 0.321       | 1.323       | 0.203       | 0.104       | 0.036       |
| Control Female-2 | 0.229       | 0.898       | 0.837       | 4.025       | 0.272       | 0.118       | 0.077       |
| Control Female-3 | 0.129       | 0.506       | 0.537       | 2.247       | 0.204       | 0.093       | 0.045       |
| Control Female-4 | 0.220       | 0.818       | 0.875       | 2.701       | 0.248       | 0.097       | 0.064       |
| Control Female-5 | 0.144       | 0.402       | 0.374       | 1.482       | 0.291       | 0.169       | 0.057       |
| Control Female-6 | 0.127       | 0.586       | 0.554       | 2.140       | 0.199       | 0.088       | 0.043       |
| Control Male-1   | 0.190       | 0.634       | 0.567       | 2.179       | 0.261       | 0.117       | 0.059       |
| Control Male-2   | 0.478       | 1.293       | 0.719       | 2.157       | 0.267       | 0.125       | 0.103       |
| Control Male-3   | 0.237       | 0.497       | 0.314       | 0.766       | 0.228       | 0.102       | 0.078       |
| Control Male-4   | 0.325       | 1.188       | 1.117       | 3.735       | 0.286       | 0.122       | 0.086       |
| Control Male-5   | 0.219       | 0.501       | 0.347       | 0.869       | 0.262       | 0.118       | 0.072       |
| Control Male-6   | 0.352       | 0.991       | 0.715       | 2.212       | 0.311       | 0.130       | 0.088       |
| LS_1 Female-1    | 0.255       | 0.563       | 0.561       | 2.103       | 0.249       | 0.088       | 0.065       |
| LS_1 Female-2    | 0.211       | 0.652       | 0.583       | 2.159       | 0.238       | 0.099       | 0.078       |
| LS_1 Female-3    | 0.211       | 0.845       | 0.875       | 3.277       | 0.287       | 0.131       | 0.072       |
| LS_1 Male-1      | 0.301       | 1.171       | 1.200       | 4.259       | 0.292       | 0.118       | 0.078       |
| LS_1 Male-2      | 0.279       | 1.345       | 1.126       | 4.069       | 0.287       | 0.122       | 0.062       |
| LS_1 Male-3      | 0.217       | 0.914       | 0.868       | 3.145       | 0.286       | 0.131       | 0.057       |
| LS_7 Female-1    | 0.292       | 0.827       | 0.609       | 1.686       | 0.295       | 0.122       | 0.113       |
| LS_7 Female-2    | 0.318       | 0.991       | 1.060       | 3.050       | 0.363       | 0.158       | 0.089       |
| LS_7 Female-3    | 0.262       | 1.162       | 1.241       | 3.645       | 0.313       | 0.125       | 0.073       |
| LS_7 Female-4    | 0.118       | 0.281       | 0.272       | 0.793       | 0.195       | 0.082       | 0.052       |
| LS_7 Male-1      | 0.241       | 0.521       | 0.382       | 0.696       | 0.181       | 0.061       | 0.074       |
| LS_7 Male-2      | 0.287       | 0.999       | 0.858       | 2.090       | 0.271       | 0.114       | 0.070       |



**Table S3: Metabolite concentrations ( $\mu\text{mol/L}$  of extract) in rat retina.***(cont.)*

| Sample ID        | PC ae C32:1 | PC ae C32:2 | PC ae C34:0 | PC ae C34:1 | PC ae C34:2 | PC ae C34:3 | PC ae C36:0 |
|------------------|-------------|-------------|-------------|-------------|-------------|-------------|-------------|
| Control Female-1 | 0.860       | 0.224       | 1.733       | 2.169       | 0.842       | 0.109       | 0.441       |
| Control Female-2 | 1.422       | 0.348       | 5.270       | 5.536       | 1.790       | 0.231       | 1.473       |
| Control Female-3 | 1.076       | 0.249       | 3.480       | 3.493       | 1.233       | 0.148       | 0.885       |
| Control Female-4 | 1.308       | 0.321       | 4.187       | 4.767       | 1.570       | 0.201       | 1.131       |
| Control Female-5 | 1.431       | 0.412       | 2.630       | 3.760       | 1.337       | 0.204       | 0.835       |
| Control Female-6 | 1.049       | 0.261       | 3.172       | 3.552       | 1.014       | 0.149       | 0.937       |
| Control Male-1   | 1.179       | 0.311       | 3.074       | 3.548       | 1.262       | 0.175       | 0.859       |
| Control Male-2   | 1.015       | 0.330       | 3.490       | 3.943       | 1.415       | 0.174       | 2.129       |
| Control Male-3   | 0.681       | 0.219       | 1.334       | 2.044       | 0.425       | 0.110       | 0.606       |
| Control Male-4   | 1.914       | 0.388       | 5.947       | 6.246       | 2.042       | 0.254       | 1.501       |
| Control Male-5   | 0.936       | 0.247       | 1.723       | 2.498       | 0.552       | 0.125       | 0.521       |
| Control Male-6   | 1.548       | 0.426       | 3.740       | 4.841       | 1.657       | 0.221       | 1.111       |
| LS_1 Female-1    | 0.885       | 0.275       | 2.684       | 3.078       | 1.117       | 0.185       | 0.915       |
| LS_1 Female-2    | 0.981       | 0.264       | 2.911       | 3.620       | 1.225       | 0.188       | 1.407       |
| LS_1 Female-3    | 1.508       | 0.350       | 4.149       | 5.021       | 1.844       | 0.229       | 1.420       |
| LS_1 Male-1      | 1.751       | 0.385       | 6.374       | 6.384       | 2.154       | 0.253       | 1.515       |
| LS_1 Male-2      | 1.676       | 0.375       | 6.315       | 6.736       | 2.018       | 0.250       | 1.744       |
| LS_1 Male-3      | 1.768       | 0.401       | 5.077       | 5.697       | 1.951       | 0.218       | 1.377       |
| LS_7 Female-1    | 1.141       | 0.289       | 3.224       | 5.884       | 1.078       | 0.225       | 1.487       |
| LS_7 Female-2    | 2.010       | 0.477       | 6.031       | 7.048       | 2.392       | 0.312       | 1.629       |
| LS_7 Female-3    | 2.256       | 0.441       | 7.024       | 7.792       | 2.473       | 0.298       | 2.148       |
| LS_7 Female-4    | 0.786       | 0.241       | 1.579       | 2.670       | 0.778       | 0.135       | 0.602       |
| LS_7 Male-1      | 0.629       | 0.177       | 1.545       | 2.797       | 0.557       | 0.116       | 0.928       |
| LS_7 Male-2      | 1.507       | 0.341       | 4.547       | 5.396       | 1.407       | 0.230       | 2.307       |

**Table S3: Metabolite concentrations ( $\mu\text{mol/L}$  of extract) in rat retina.***(cont.)*

| Sample ID        | PC ae C36:1 | PC ae C36:2 | PC ae C36:3 | PC ae C36:4 | PC ae C36:5 | PC ae C38:0 | PC ae C38:1 |
|------------------|-------------|-------------|-------------|-------------|-------------|-------------|-------------|
| Control Female-1 | 1.165       | 0.502       | 0.375       | 0.340       | 0.738       | 0.559       | 0.197       |
| Control Female-2 | 3.581       | 1.270       | 0.703       | 1.032       | 2.362       | 1.892       | 0.649       |
| Control Female-3 | 2.377       | 0.865       | 0.489       | 0.541       | 1.382       | 0.953       | 0.374       |
| Control Female-4 | 2.981       | 1.075       | 0.697       | 0.838       | 2.122       | 1.626       | 0.544       |
| Control Female-5 | 2.084       | 0.904       | 0.554       | 0.613       | 1.281       | 1.212       | 0.391       |
| Control Female-6 | 2.277       | 0.795       | 0.474       | 0.611       | 1.204       | 1.269       | 0.393       |
| Control Male-1   | 2.251       | 0.859       | 0.490       | 0.555       | 1.338       | 0.841       | 0.387       |
| Control Male-2   | 3.036       | 1.048       | 0.555       | 0.875       | 1.855       | 1.704       | 0.820       |
| Control Male-3   | 1.168       | 0.386       | 0.214       | 0.434       | 0.441       | 1.254       | 0.278       |
| Control Male-4   | 4.076       | 1.408       | 0.875       | 1.095       | 2.732       | 1.707       | 0.718       |
| Control Male-5   | 1.351       | 0.443       | 0.298       | 0.454       | 0.474       | 1.061       | 0.265       |
| Control Male-6   | 3.006       | 1.161       | 0.694       | 1.042       | 2.381       | 1.706       | 0.621       |
| LS_1 Female-1    | 2.169       | 0.809       | 0.435       | 0.685       | 1.512       | 1.731       | 0.449       |
| LS_1 Female-2    | 2.277       | 0.917       | 0.488       | 0.735       | 1.472       | 1.869       | 0.524       |
| LS_1 Female-3    | 3.227       | 1.196       | 0.751       | 0.917       | 2.081       | 2.255       | 0.573       |
| LS_1 Male-1      | 4.407       | 1.544       | 0.910       | 1.200       | 2.961       | 2.774       | 0.793       |
| LS_1 Male-2      | 4.639       | 1.470       | 0.875       | 1.185       | 2.781       | 2.633       | 0.918       |
| LS_1 Male-3      | 3.543       | 1.331       | 0.835       | 0.985       | 2.180       | 2.153       | 0.666       |
| LS_7 Female-1    | 3.874       | 1.068       | 0.618       | 1.560       | 1.466       | 2.879       | 0.711       |
| LS_7 Female-2    | 4.853       | 1.687       | 1.018       | 1.352       | 2.935       | 2.172       | 0.849       |
| LS_7 Female-3    | 5.054       | 1.754       | 1.093       | 1.379       | 3.221       | 2.335       | 0.949       |
| LS_7 Female-4    | 1.503       | 0.579       | 0.338       | 0.687       | 1.114       | 1.823       | 0.319       |
| LS_7 Male-1      | 1.868       | 0.525       | 0.324       | 0.775       | 0.745       | 1.899       | 0.423       |
| LS_7 Male-2      | 3.839       | 1.133       | 0.664       | 1.099       | 1.799       | 2.132       | 0.899       |

**Table S3: Metabolite concentrations ( $\mu\text{mol/L}$  of extract) in rat retina.***(cont.)*

| Sample ID        | PC ae C38:2 | PC ae C38:3 | PC ae C38:4 | PC ae C38:5 | PC ae C38:6 | PC ae C40:1 | PC ae C40:2 |
|------------------|-------------|-------------|-------------|-------------|-------------|-------------|-------------|
| Control Female-1 | 0.117       | 0.150       | 0.431       | 0.816       | 0.908       | 0.598       | 0.145       |
| Control Female-2 | 0.303       | 0.610       | 1.422       | 2.501       | 2.794       | 1.587       | 0.373       |
| Control Female-3 | 0.187       | 0.274       | 0.858       | 1.525       | 1.662       | 0.940       | 0.224       |
| Control Female-4 | 0.267       | 0.441       | 1.075       | 1.879       | 2.271       | 1.626       | 0.376       |
| Control Female-5 | 0.205       | 0.329       | 0.697       | 1.293       | 1.519       | 1.067       | 0.255       |
| Control Female-6 | 0.197       | 0.345       | 0.878       | 1.411       | 1.660       | 1.263       | 0.305       |
| Control Male-1   | 0.203       | 0.391       | 0.859       | 1.273       | 1.504       | 0.746       | 0.204       |
| Control Male-2   | 0.419       | 1.287       | 1.187       | 1.704       | 1.855       | 1.209       | 0.339       |
| Control Male-3   | 0.174       | 0.516       | 0.568       | 0.610       | 1.216       | 0.979       | 0.280       |
| Control Male-4   | 0.357       | 0.662       | 1.636       | 2.710       | 3.002       | 1.643       | 0.407       |
| Control Male-5   | 0.168       | 0.470       | 0.650       | 0.685       | 1.237       | 1.222       | 0.255       |
| Control Male-6   | 0.346       | 0.726       | 1.260       | 2.222       | 2.698       | 1.756       | 0.434       |
| LS_1 Female-1    | 0.253       | 0.472       | 0.942       | 1.282       | 1.862       | 1.380       | 0.333       |
| LS_1 Female-2    | 0.327       | 0.637       | 0.966       | 1.353       | 1.719       | 1.579       | 0.319       |
| LS_1 Female-3    | 0.311       | 0.571       | 1.238       | 1.994       | 2.679       | 1.670       | 0.384       |
| LS_1 Male-1      | 0.432       | 0.660       | 1.790       | 2.961       | 3.522       | 2.607       | 0.637       |
| LS_1 Male-2      | 0.450       | 0.780       | 1.881       | 2.918       | 3.499       | 2.530       | 0.612       |
| LS_1 Male-3      | 0.328       | 0.510       | 1.305       | 2.369       | 2.910       | 2.042       | 0.506       |
| LS_7 Female-1    | 0.380       | 0.942       | 1.748       | 2.261       | 3.371       | 2.732       | 0.585       |
| LS_7 Female-2    | 0.382       | 0.677       | 1.722       | 3.085       | 3.790       | 1.872       | 0.485       |
| LS_7 Female-3    | 0.391       | 0.764       | 1.773       | 3.300       | 3.901       | 2.059       | 0.488       |
| LS_7 Female-4    | 0.177       | 0.314       | 0.690       | 0.992       | 1.510       | 1.640       | 0.370       |
| LS_7 Male-1      | 0.237       | 0.708       | 0.849       | 1.044       | 1.765       | 1.600       | 0.374       |
| LS_7 Male-2      | 0.393       | 1.049       | 1.332       | 2.040       | 2.482       | 1.482       | 0.335       |

**Table S3: Metabolite concentrations ( $\mu\text{mol/L}$  of extract) in rat retina.***(cont.)*

| Sample ID        | PC ae C40:3 | PC ae C40:4 | PC ae C40:5 | PC ae C40:6 | PC ae C42:0 | PC ae C42:1 | PC ae C42:2 |
|------------------|-------------|-------------|-------------|-------------|-------------|-------------|-------------|
| Control Female-1 | 0.116       | 0.173       | 0.252       | 0.864       | 0.454       | 0.397       | 0.258       |
| Control Female-2 | 0.480       | 0.582       | 1.164       | 2.819       | 1.269       | 1.145       | 0.635       |
| Control Female-3 | 0.241       | 0.313       | 0.509       | 1.736       | 0.797       | 0.677       | 0.443       |
| Control Female-4 | 0.465       | 0.410       | 0.892       | 2.131       | 1.019       | 1.037       | 0.697       |
| Control Female-5 | 0.267       | 0.295       | 0.503       | 1.274       | 0.672       | 0.609       | 0.399       |
| Control Female-6 | 0.307       | 0.347       | 0.646       | 1.702       | 0.765       | 0.741       | 0.539       |
| Control Male-1   | 0.335       | 0.350       | 0.622       | 1.718       | 0.705       | 0.794       | 0.432       |
| Control Male-2   | 1.138       | 0.683       | 2.129       | 2.006       | 1.089       | 1.052       | 0.675       |
| Control Male-3   | 0.466       | 0.296       | 0.918       | 1.220       | 0.516       | 0.738       | 0.563       |
| Control Male-4   | 0.647       | 0.648       | 1.181       | 3.222       | 1.188       | 1.480       | 0.754       |
| Control Male-5   | 0.431       | 0.306       | 0.877       | 1.429       | 0.540       | 0.815       | 0.607       |
| Control Male-6   | 0.673       | 0.533       | 1.171       | 2.222       | 1.062       | 1.260       | 0.829       |
| LS_1 Female-1    | 0.436       | 0.367       | 0.883       | 1.819       | 0.953       | 0.804       | 0.492       |
| LS_1 Female-2    | 0.562       | 0.418       | 1.214       | 1.805       | 0.943       | 0.829       | 0.549       |
| LS_1 Female-3    | 0.531       | 0.525       | 1.119       | 2.616       | 1.271       | 0.997       | 0.635       |
| LS_1 Male-1      | 0.606       | 0.642       | 1.279       | 3.856       | 1.466       | 2.095       | 1.210       |
| LS_1 Male-2      | 0.679       | 0.748       | 1.573       | 4.183       | 1.516       | 2.063       | 1.277       |
| LS_1 Male-3      | 0.454       | 0.486       | 1.051       | 3.034       | 1.090       | 1.612       | 0.992       |
| LS_7 Female-1    | 0.710       | 0.658       | 1.884       | 3.277       | 1.204       | 1.267       | 1.057       |
| LS_7 Female-2    | 0.597       | 0.619       | 1.190       | 3.096       | 1.329       | 1.140       | 0.791       |
| LS_7 Female-3    | 0.728       | 0.664       | 1.547       | 3.369       | 1.389       | 1.271       | 0.859       |
| LS_7 Female-4    | 0.252       | 0.258       | 0.532       | 1.114       | 0.660       | 0.626       | 0.539       |
| LS_7 Male-1      | 0.519       | 0.416       | 1.337       | 1.673       | 0.659       | 0.891       | 0.837       |
| LS_7 Male-2      | 0.924       | 0.658       | 1.990       | 2.282       | 0.983       | 0.991       | 0.707       |

**Table S3: Metabolite concentrations ( $\mu\text{mol/L}$  of extract) in rat retina.***(cont.)*

| Sample ID        | PC ae C42:3 | PC ae C42:4 | PC ae C42:5 | PC ae C44:3 | PC ae C44:4 | PC ae C44:5 | PC ae C44:6 |
|------------------|-------------|-------------|-------------|-------------|-------------|-------------|-------------|
| Control Female-1 | 1.248       | 0.073       | 0.533       | 0.378       | 0.371       | 21.563      | 0.124       |
| Control Female-2 | 3.644       | 0.226       | 2.438       | 1.181       | 0.780       | 71.362      | 0.370       |
| Control Female-3 | 2.009       | 0.105       | 1.103       | 0.654       | 0.511       | 37.725      | 0.193       |
| Control Female-4 | 3.206       | 0.304       | 1.757       | 0.944       | 0.799       | 54.957      | 0.312       |
| Control Female-5 | 2.028       | 0.152       | 0.929       | 0.594       | 0.387       | 35.720      | 0.230       |
| Control Female-6 | 2.852       | 0.183       | 1.281       | 0.753       | 0.623       | 41.919      | 0.232       |
| Control Male-1   | 1.996       | 0.127       | 1.327       | 0.723       | 1.031       | 33.344      | 0.246       |
| Control Male-2   | 2.940       | 0.203       | 4.067       | 1.253       | 0.849       | 39.566      | 0.470       |
| Control Male-3   | 3.359       | 0.237       | 1.244       | 0.918       | 1.154       | 48.251      | 0.362       |
| Control Male-4   | 4.176       | 0.316       | 2.198       | 1.366       | 1.494       | 56.694      | 0.369       |
| Control Male-5   | 3.172       | 0.196       | 1.382       | 0.916       | 1.527       | 34.736      | 0.289       |
| Control Male-6   | 5.139       | 0.269       | 1.885       | 1.419       | 1.657       | 60.318      | 0.397       |
| LS_1 Female-1    | 2.739       | 0.226       | 1.424       | 0.804       | 0.508       | 49.299      | 0.306       |
| LS_1 Female-2    | 2.224       | 0.179       | 2.320       | 0.721       | 0.549       | 35.555      | 0.245       |
| LS_1 Female-3    | 3.215       | 0.232       | 2.268       | 0.917       | 0.733       | 51.831      | 0.344       |
| LS_1 Male-1      | 6.345       | 0.275       | 2.371       | 1.741       | 2.371       | 67.876      | 0.418       |
| LS_1 Male-2      | 6.622       | 0.241       | 2.781       | 1.858       | 3.693       | 61.893      | 0.438       |
| LS_1 Male-3      | 4.209       | 0.187       | 1.932       | 1.201       | 1.755       | 50.442      | 0.340       |
| LS_7 Female-1    | 6.459       | 0.430       | 2.314       | 1.539       | 2.649       | 64.489      | 0.404       |
| LS_7 Female-2    | 4.009       | 0.308       | 1.849       | 1.167       | 1.340       | 42.865      | 0.300       |
| LS_7 Female-3    | 5.054       | 0.298       | 2.847       | 1.379       | 1.714       | 54.182      | 0.316       |
| LS_7 Female-4    | 3.204       | 0.191       | 0.706       | 0.637       | 0.674       | 34.634      | 0.191       |
| LS_7 Male-1      | 4.140       | 0.250       | 1.435       | 1.014       | 3.248       | 37.979      | 0.318       |
| LS_7 Male-2      | 3.731       | 0.247       | 3.081       | 1.083       | 2.715       | 31.811      | 0.335       |

**Table S3: Metabolite concentrations ( $\mu\text{mol/L}$  of extract) in rat retina.***(cont.)*

| Sample ID        | SM (OH) C14:1 | SM (OH) C16:1 | SM (OH) C22:1 | SM (OH) C22:2 | SM (OH) C24:1 | SM C16:0 | SM C16:1 |
|------------------|---------------|---------------|---------------|---------------|---------------|----------|----------|
| Control Female-1 | 0.073         | 0.259         | 0.131         | 0.065         | 0.045         | 15.321   | 0.803    |
| Control Female-2 | 0.207         | 0.839         | 0.470         | 0.197         | 0.184         | 40.126   | 1.435    |
| Control Female-3 | 0.105         | 0.509         | 0.232         | 0.124         | 0.080         | 21.995   | 0.940    |
| Control Female-4 | 0.162         | 0.598         | 0.287         | 0.157         | 0.106         | 29.161   | 1.271    |
| Control Female-5 | 0.122         | 0.435         | 0.200         | 0.099         | 0.078         | 22.788   | 1.375    |
| Control Female-6 | 0.148         | 0.560         | 0.269         | 0.156         | 0.090         | 25.555   | 1.121    |
| Control Male-1   | 0.156         | 0.486         | 0.241         | 0.120         | 0.088         | 23.216   | 1.048    |
| Control Male-2   | 0.180         | 0.746         | 0.338         | 0.012         | 0.146         | 28.576   | 1.374    |
| Control Male-3   | 0.155         | 0.397         | 0.044         | 0.008         | 0.039         | 25.686   | 1.523    |
| Control Male-4   | 0.197         | 0.889         | 0.425         | 0.205         | 0.144         | 41.258   | 1.501    |
| Control Male-5   | 0.125         | 0.373         | 0.042         | 0.011         | 0.052         | 22.831   | 1.472    |
| Control Male-6   | 0.212         | 0.656         | 0.208         | 0.102         | 0.059         | 35.616   | 1.994    |
| LS_1 Female-1    | 0.162         | 0.467         | 0.267         | 0.153         | 0.105         | 24.211   | 1.238    |
| LS_1 Female-2    | 0.131         | 0.484         | 0.363         | 0.101         | 0.129         | 23.202   | 1.028    |
| LS_1 Female-3    | 0.171         | 0.640         | 0.460         | 0.198         | 0.145         | 31.522   | 1.271    |
| LS_1 Male-1      | 0.222         | 0.925         | 0.493         | 0.242         | 0.199         | 41.316   | 1.515    |
| LS_1 Male-2      | 0.205         | 0.962         | 0.383         | 0.133         | 0.169         | 40.350   | 1.516    |
| LS_1 Male-3      | 0.159         | 0.679         | 0.397         | 0.211         | 0.144         | 32.171   | 1.318    |
| LS_7 Female-1    | 0.308         | 1.039         | 0.110         | 0.050         | 0.072         | 47.110   | 2.073    |
| LS_7 Female-2    | 0.266         | 1.005         | 0.434         | 0.239         | 0.133         | 44.599   | 1.583    |
| LS_7 Female-3    | 0.246         | 1.005         | 0.403         | 0.174         | 0.142         | 44.331   | 1.606    |
| LS_7 Female-4    | 0.143         | 0.359         | 0.068         | 0.022         | 0.049         | 25.479   | 1.602    |
| LS_7 Male-1      | 0.203         | 0.565         | 0.061         | 0.019         | 0.029         | 31.995   | 1.728    |
| LS_7 Male-2      | 0.204         | 0.717         | 0.273         | 0.074         | 0.127         | 35.558   | 1.724    |

**Table S3: Metabolite concentrations ( $\mu\text{mol/L}$  of extract) in rat retina.***(cont.)*

| Sample ID        | SM C18:0 | SM C18:1 | SM C20:2 | SM C22:3 | SM C24:0 | SM C24:1 | SM C26:0 | SM C26:1 |
|------------------|----------|----------|----------|----------|----------|----------|----------|----------|
| Control Female-1 | 18.595   | 1.309    | 0.022    | 0.107    | 1.179    | 1.942    | 0.020    | 0.048    |
| Control Female-2 | 58.411   | 4.228    | 0.042    | 0.335    | 3.682    | 3.936    | 0.085    | 0.113    |
| Control Female-3 | 34.184   | 2.240    | 0.035    | 0.173    | 1.893    | 2.356    | 0.045    | 0.071    |
| Control Female-4 | 44.489   | 3.075    | 0.046    | 0.201    | 2.309    | 2.589    | 0.063    | 0.094    |
| Control Female-5 | 32.581   | 2.662    | 0.052    | 0.166    | 1.764    | 2.084    | 0.051    | 0.103    |
| Control Female-6 | 33.737   | 2.312    | 0.049    | 0.174    | 2.526    | 2.674    | 0.065    | 0.077    |
| Control Male-1   | 27.954   | 1.854    | 0.033    | 0.155    | 2.073    | 2.772    | 0.031    | 0.078    |
| Control Male-2   | 36.819   | 2.706    | 0.041    | 0.216    | 3.077    | 2.913    | 0.109    | 0.165    |
| Control Male-3   | 19.679   | 2.020    | 0.025    | 0.158    | 0.407    | 0.487    | 0.026    | 0.035    |
| Control Male-4   | 55.342   | 3.542    | 0.076    | 0.373    | 3.742    | 3.763    | 0.083    | 0.112    |
| Control Male-5   | 19.737   | 1.582    | 0.026    | 0.156    | 0.458    | 0.580    | 0.035    | 0.029    |
| Control Male-6   | 40.774   | 3.611    | 0.060    | 0.296    | 2.252    | 2.312    | 0.033    | 0.103    |
| LS_1 Female-1    | 30.675   | 2.662    | 0.024    | 0.144    | 2.224    | 2.333    | 0.047    | 0.088    |
| LS_1 Female-2    | 33.621   | 2.406    | 0.037    | 0.191    | 2.793    | 3.072    | 0.081    | 0.107    |
| LS_1 Female-3    | 46.473   | 3.165    | 0.060    | 0.202    | 3.676    | 3.999    | 0.047    | 0.097    |
| LS_1 Male-1      | 62.663   | 3.964    | 0.082    | 0.342    | 4.230    | 4.771    | 0.098    | 0.123    |
| LS_1 Male-2      | 67.592   | 4.024    | 0.082    | 0.435    | 4.103    | 4.411    | 0.075    | 0.139    |
| LS_1 Male-3      | 46.658   | 2.963    | 0.081    | 0.294    | 3.230    | 3.478    | 0.078    | 0.116    |
| LS_7 Female-1    | 50.042   | 5.632    | 0.062    | 0.367    | 0.992    | 0.933    | 0.040    | 0.049    |
| LS_7 Female-2    | 67.707   | 3.963    | 0.067    | 0.231    | 3.882    | 4.367    | 0.088    | 0.124    |
| LS_7 Female-3    | 75.165   | 4.581    | 0.083    | 0.462    | 3.684    | 3.842    | 0.104    | 0.111    |
| LS_7 Female-4    | 25.632   | 3.059    | 0.027    | 0.143    | 0.735    | 0.689    | 0.032    | 0.035    |
| LS_7 Male-1      | 26.256   | 3.096    | 0.038    | 0.142    | 0.564    | 0.455    | 0.024    | 0.018    |
| LS_7 Male-2      | 52.629   | 3.506    | 0.062    | 0.257    | 2.715    | 2.798    | 0.045    | 0.077    |

**Table S3: Metabolite concentrations ( $\mu\text{mol/L}$  of extract) in rat retina.**

(cont.)

| Sample ID        | H1       |
|------------------|----------|
| Control Female-1 | 1548.250 |
| Control Female-2 | 3086.870 |
| Control Female-3 | 1907.360 |
| Control Female-4 | 1587.950 |
| Control Female-5 | 1305.770 |
| Control Female-6 | 1616.290 |
| Control Male-1   | 1974.570 |
| Control Male-2   | 3624.150 |
| Control Male-3   | 552.045  |
| Control Male-4   | 1604.060 |
| Control Male-5   | 402.179  |
| Control Male-6   | 1768.870 |
| LS_1 Female-1    | 2529.590 |
| LS_1 Female-2    | 2536.090 |
| LS_1 Female-3    | 3810.070 |
| LS_1 Male-1      | 2363.870 |
| LS_1 Male-2      | 3112.880 |
| LS_1 Male-3      | 1733.180 |
| LS_7 Female-1    | 688.856  |
| LS_7 Female-2    | 2763.720 |
| LS_7 Female-3    | 2760.320 |
| LS_7 Female-4    | 944.412  |
| LS_7 Male-1      | 683.868  |
| LS_7 Male-2      | 1732.930 |



**Supplementary Table S4. Metabolic ratios in male and female control retinas.** Median values were calculated for each group. P-values were calculated using the Wilcoxon rank sum test. *Legend:* ADMA= asymmetric dimethylarginine; NO= nitric oxide; Methionine-SO= methionine sulfoxide; C0= carnitine; C2=acetyl-L-carnitine; C3= propionyl-L-carnitine; lyso-PC= lysophosphatidylcholine; PC= phosphatidylcholine; SM= sphingomyelin; MUFA= mono-unsaturated fatty acid; PUFA= poly-unsaturated fatty acid; SFA= saturated fatty acid; CPT-1= carnitine palmitoyltransferase I. Asterisks (\*) stand for significant ratios using a constant non-adjusted P-value threshold of 0.05. Black circles (•) stand for significant ratios using adjusted P-values to keep a false discovery rate less than 10% upon multiple comparisons.

| Ratio                                                | Metabolic significance                                                  | Sex                  |                      | P-value |
|------------------------------------------------------|-------------------------------------------------------------------------|----------------------|----------------------|---------|
|                                                      |                                                                         | Female               | Male                 |         |
| <b>Amino acid and biogenic amine metabolism</b>      |                                                                         |                      |                      |         |
| ADMA/Arginine                                        | Inhibition of NO synthase                                               | $4.71 \cdot 10^{-3}$ | $3.31 \cdot 10^{-3}$ | 0.078   |
| Citrulline/Arginine                                  | Activity of NO synthase                                                 | 0.15                 | 0.11                 | 0.055   |
| Tyrosine/Phenylalanine                               | Activity of phenylalanine hydroxylase                                   | 1.46                 | 1.99                 | 0.025*• |
| Methionine-SO/Methionine                             | Measure of systemic oxidative stress                                    | 0.21                 | 0.26                 | 0.75    |
| Spermidine/Putrescine                                | Activity of spermidine synthase                                         | 3.62                 | 3.77                 | 0.52    |
| <b>Lipid metabolism</b>                              |                                                                         |                      |                      |         |
| (C2 + C3)/C0                                         | Measure of the overall $\beta$ -oxidation activity                      | 0.32                 | 0.26                 | 0.015*• |
| C2/C0                                                | Measure of $\beta$ -oxidation of even numbered fatty acids              | 0.30                 | 0.25                 | 0.026*• |
| (C16 + C18)/C0                                       | Activity of CPT-I, rate limiting step in the mitochondrial uptake of FA | $7.29 \cdot 10^{-3}$ | $6.05 \cdot 10^{-3}$ | 0.31    |
| Total dicarboxy-acylcarnitines/ total acylcarnitines | Indicator of $\omega$ -oxidation of fatty acids                         | $9.47 \cdot 10^{-2}$ | $8.19 \cdot 10^{-2}$ | 0.025*• |
| Total lyso PC/Total PC                               | Indicator of phospholipase activity                                     | $4.16 \cdot 10^{-2}$ | $4.24 \cdot 10^{-2}$ | 0.75    |
| Lysophosphatidylcholine                              | MUFA/SFA                                                                | 0.33                 | 0.30                 | 0.15    |
|                                                      | PUFA/MUFA                                                               | 0.39                 | 0.40                 | 0.42    |
|                                                      | PUFA/SFA                                                                | 0.13                 | 0.12                 | 0.26    |
| Phosphatidylcholine                                  | MUFA/SFA                                                                | 1.70                 | 1.64                 | 0.42    |
|                                                      | PUFA/MUFA                                                               | 1.49                 | 1.49                 | 0.87    |
|                                                      | PUFA/SFA                                                                | 2.53                 | 2.59                 | 1.0     |
| Sphingomyelin                                        | MUFA/SFA                                                                | 0.11                 | 0.11                 | 0.42    |
|                                                      | PUFA/MUFA                                                               | $4.98 \cdot 10^{-2}$ | $4.55 \cdot 10^{-2}$ | 0.42    |
|                                                      | PUFA/SFA                                                                | $5.58 \cdot 10^{-3}$ | $5.12 \cdot 10^{-3}$ | 0.75    |

**Supplementary Table S5. Metabolic ratios between in control and light-treated retinas.** Median values were calculated for each group. P-values were calculated using non-parametric Kruskal-Wallis test for multiple group comparison. Legend: C0= carnitine; C2= acetyl-L-carnitine; C3= propionyl-L-carnitine; C16= hexadecanoyl-L-carnitine; C18= Octadecanoyl-L-carnitine; ADMA= asymmetric dimethylarginine; NO= nitric oxide; Methionine-SO= methionine sulfoxide; lyso PC= lysophosphatidylcholine; PC= phosphatidylcholine; SM sphingomyelin MUFA= mono-unsaturated fatty acid; PUFA= poly-unsaturated fatty acid; SFA= saturated fatty acid; CPT-1= carnitine palmitoyltransferase I. Asterisks (\*) stand for significant ratios using a constant non-adjusted P-value threshold of 0.05. Black circles (●) stand for significant ratios using adjusted P-values to keep a false discovery rate less than 10% upon multiple comparisons.

| Ratio                                               |           | Metabolic significance                                                  | Group                |                       |                      | P-value |
|-----------------------------------------------------|-----------|-------------------------------------------------------------------------|----------------------|-----------------------|----------------------|---------|
|                                                     |           |                                                                         | Controls             | LS_1                  | LS_7                 |         |
| <b>Amino acid and biogenic amine metabolism</b>     |           |                                                                         |                      |                       |                      |         |
| ADMA/Arginine                                       |           | Inhibition of NO synthase                                               | $4.09 \cdot 10^{-3}$ | $5.62 \cdot 10^{-3}$  | $5.39 \cdot 10^{-3}$ | 0.16    |
| Citrulline/Arginine                                 |           | Activity of NO synthase                                                 | 0.14                 | 0.12                  | 0.23                 | 0.025*● |
| Tyrosine/Phenylalanine                              |           | Activity of phenylalanine hydroxylase                                   | 1.76                 | 1.63                  | 1.51                 | 0.21    |
| Methionine-SO/Methionine                            |           | Measure of systemic oxidative stress                                    | 0.21                 | 0.32                  | 0.52                 | 0.52    |
| Spermidine/Putrescine                               |           | Activity of spermidine synthase                                         | 3.74                 | 1.73                  | 3.41                 | 0.11    |
| <b>Lipid metabolism</b>                             |           |                                                                         |                      |                       |                      |         |
| (C2 + C3)/C0                                        |           | Measure of the overall $\beta$ -oxidation activity                      | 0.29                 | 0.28                  | 0.31                 | 0.86    |
| C2/C0                                               |           | Measure of $\beta$ -oxidation of even numbered fatty acids              | 0.27                 | 0.27                  | 0.29                 | 0.85    |
| (C16 + C18)/C0                                      |           | Activity of CPT-I, rate limiting step in the mitochondrial uptake of FA | $6.73 \cdot 10^{-3}$ | $13.64 \cdot 10^{-3}$ | $6.67 \cdot 10^{-3}$ | 0.18    |
| Total dicarboxy-acylcarnitines/total acylcarnitines |           | Indicator of $\omega$ -oxidation of fatty acids                         | $8.81 \cdot 10^{-2}$ | $7.90 \cdot 10^{-2}$  | $9.6 \cdot 10^{-2}$  | 0.058   |
| Total lyso PC/Total PC                              |           | Indicator of phospholipase activity                                     | $4.16 \cdot 10^{-2}$ | $4.00 \cdot 10^{-2}$  | $3.97 \cdot 10^{-2}$ | 0.91    |
| Lyso PC                                             | MUFA/SFA  | Measure of the activity of fatty acid desaturases                       | 0.31                 | 0.29                  | 0.31                 | 0.33    |
|                                                     | PUFA/MUFA |                                                                         | 0.39                 | 0.47                  | 0.43                 | 0.012*● |
|                                                     | PUFA/SFA  |                                                                         | 0.13                 | 0.14                  | 0.13                 | 0.23    |
| PC                                                  | MUFA/SFA  |                                                                         | 1.69                 | 1.69                  | 1.86                 | 0.011*● |
|                                                     | PUFA/MUFA |                                                                         | 1.49                 | 1.59                  | 1.44                 | 0.43    |
|                                                     | PUFA/SFA  |                                                                         | 2.53                 | 2.67                  | 2.77                 | 0.44    |
| SM                                                  | MUFA/SFA  |                                                                         | 0.114                | 0.117                 | 0.104                | 0.029*● |
|                                                     | PUFA/MUFA |                                                                         | $4.8 \cdot 10^{-2}$  | $5.0 \cdot 10^{-2}$   | $4.3 \cdot 10^{-2}$  | 0.32    |
|                                                     | PUFA/SFA  |                                                                         | $5.6 \cdot 10^{-3}$  | $5.7 \cdot 10^{-3}$   | $4.5 \cdot 10^{-3}$  | 0.048   |

### Supplementary Table S6. Metabolites excluded from the statistical analysis.

The present table of 23 metabolites represents the list of compounds that were not considered for the statistical analysis because more than 20% of their concentration values were below the lower limit of quantitation or above the upper limit of quantification is given here after. Concentration of all of the metabolites listed here, except for amino acids (\*), were below the lower limit of quantification (LLOQ).

| <b>Acylcarnitines</b> | <b>Amino acids*</b> | <b>Biogenic amines</b> | <b>Lyso PC</b> | <b>PC</b>   |
|-----------------------|---------------------|------------------------|----------------|-------------|
| C10                   | Asp                 | alpha-AAA              | lysoPC a C14:0 | PC aa C26:0 |
| C10:1                 | Gln                 | DOPA                   |                | PC aa C40:1 |
| C10:2                 | Lys                 | Nitro-Tyr              |                |             |
| C12-DC                |                     |                        |                |             |
| C14:1-OH              |                     |                        |                |             |
| C16:1-OH              |                     |                        |                |             |
| C16:2-OH              |                     |                        |                |             |
| C18:1-OH              |                     |                        |                |             |
| C3-OH                 |                     |                        |                |             |
| C5-M-DC               |                     |                        |                |             |
| C5:1-DC               |                     |                        |                |             |
| C6:1                  |                     |                        |                |             |
| C7-DC                 |                     |                        |                |             |
| C9                    |                     |                        |                |             |
